# Supplementary material for: The effects of molecular structure and functional group of a rodlike Schiff base mesogen on blue phase stabilization in a chiral system
Source: Royal Society of Chemistry journal article supplement (doi:10.1039/c8nj04493g), 2018-12-17
Supplement: c8nj04493g1.pdf [file c8nj04493g1.pdf]

# **The effects of molecular structure and functional group of rodlike Schiff base mesogen on blue phase stabilization in chiral system**

Chiung-Cheng Huang,<sup>\*a</sup> Yu-Chang Huang,<sup>a</sup> Wei-Cheng Hsieh,<sup>a</sup> Yen-Jung Chen,<sup>a</sup> Shi-Kai  
Jiang,<sup>a</sup> Bo-Hao Chen,<sup>b, d</sup> I-Jui Hsu,<sup>\*b, c</sup> and Jey-Jau Lee<sup>d</sup>

<sup>a</sup>*Department of Chemical Engineering, Tatung University, Taipei 104, Taiwan* <sup>a</sup>E-

*mail: [chchhuang@ttu.edu.tw](mailto:chchhuang@ttu.edu.tw)*

<sup>a</sup>*Tel.: +886-2-77364681*

<sup>b</sup>*Department of Molecular Science and Engineering, National Taipei University of Technology, Taipei 106,  
Taiwan*

<sup>c</sup> *Research and Development Center for Smart Textile Technology, National Taipei University of  
Technology, Taipei 106, Taiwan*

<sup>b, c</sup> *E-mail: [ijuihsu@mail.ntut.edu.tw](mailto:ijuihsu@mail.ntut.edu.tw)*

<sup>b, c</sup> *Tel.: +886-2-27712171 # 2420*

<sup>d</sup>*National Synchrotron Radiation Research Center, Hsinchu 300, Taiwan*

**Electronic supplementary information (ESI)**

All of the spectroscopic analysis and microanalytical data for the target products and the intermediates are shown following.

**A1.** (70 % yield)  $^1\text{H-NMR}$  ( $\text{CDCl}_3$ ):  $\delta$  (ppm) 10.52 (s, -OH, 1H), 10.04 (s, -CH=O, 1H), 8.00 (d, Ar-H, 2H,  $J = 8.6$  Hz), 7.95 (d, Ar-H, 1H,  $J = 8.6$  Hz), 7.41 (d, Ar-H, 2H,  $J = 8.6$  Hz), 6.54 (dd, Ar-H, 1H,  $J = 8.9$  Hz,  $J = 2.3$  Hz), 6.50 (d, Ar-H, 1H,  $J = 2.2$  Hz), 4.03 (t, -OCH<sub>2</sub>, 2H,  $J = 6.5$  Hz), 1.87-1.78 (m, -CH<sub>2</sub>-, 2H), 1.51-1.27 (m, -CH<sub>2</sub>-, 6H), 0.92 (t, -CH<sub>3</sub>, 3H,  $J = 6.9$  Hz).

**A2.** (65% yield)  $^1\text{H-NMR}$  ( $\text{CDCl}_3$ ) :  $\delta$  (ppm) 10.0 (s, -CH=O, 1H), 7.97 (d, Ar-H, 2H,  $J=8.5$  Hz), 7.86 - 7.82(m, Ar-H, 1H), 7.41(d, Ar-H, 1H  $J=8.6$  Hz), 6.85 - 6.81(m, Ar-H, 1H), 4.12 (t, -OCH<sub>2</sub>-, 2H,  $J=6.6$  Hz), 1.90 - 1.29 (m, -CH<sub>2</sub>-, -CH<sub>3</sub>, 12H), 0.90 - 0.88 (m, -CH<sub>3</sub>, 3H)

**A3.** (36 % yield)  $^1\text{H-NMR}$  ( $\text{CDCl}_3$ ):  $\delta$  (ppm) 11.28 (s, -OH, 1H), 10.49 (s, -OH, 1H), 9.92 (s, -CH=O, 1H), 7.93 (d, Ar-H, 1H,  $J = 8.9$  Hz), 7.65 (d, Ar-H, 1H,  $J = 8.3$  Hz), 6.92 (dd, Ar-H, 1H,  $J = 8.3$  Hz,  $J = 2.0$  Hz), 6.54 (d, Ar-H, 1H,  $J = 8.9$  Hz), 6.89 (d, Ar-H, 1H,  $J = 2.25$  Hz), 6.54 (dd, Ar-H, 1H,  $J = 8.9$  Hz,  $J = 2.6$  Hz), 6.50 (d, Ar-H, 1H,  $J = 2.3$  Hz), 4.03 (t, -OCH<sub>2</sub>, 2H,  $J = 6.5$  Hz), 1.81-1.78 (m, -CH<sub>2</sub>-, 2H), 1.52-1.24 (m, -CH<sub>2</sub>-, 6H), 0.92 (t, -CH<sub>3</sub>, 3H,  $J = 6.9$  Hz).

**A4.** (41% yield)  $^1\text{H-NMR}$  ( $\text{CDCl}_3$ ) : $\delta$ (ppm) 11.2(s, Ar-OH, 1H), 9.90(s, -CH=O, 1H), 7.85 - 7.81 (m, Ar-H, 1H), 7.63(d, Ar-H, 2H,  $J=8.5$  Hz), 6.95 - 6.91(m, Ar-H, 2H), 6.85 - 6.82(m, Ar-H, 1H), 4.15 (t, -OCH<sub>2</sub>-, 2H,  $J=6.5$  Hz), 1.90 - 1.36 (m, -CH<sub>2</sub>-, -CH<sub>3</sub>, 8H), 0.93 (t, -CH<sub>3</sub>, 3H,  $J=6.8$  Hz).

**H-EI<sub>6</sub>-OH.**  $^1\text{H-NMR}$  (Acetone- $d_6$ ):  $\delta$  (ppm) 10.59 (s, Ar-OH, 1H), 8.68 (s, -CH=N-, 1H), 8.08 (d, Ar-H, 2H,  $J = 8.7$  Hz), 8.03 (d, Ar-H, 1H,  $J = 8.9$  Hz), 7.47 (d, Ar-H, 2H,  $J = 8.6$  Hz), 7.31 (d, Ar-H, 2H,  $J = 8.8$  Hz), 6.99 (d, Ar-H, 2H,  $J = 8.9$  Hz), 6.64 (dd, Ar-H, 1H,  $J = 8.9$  Hz,  $J = 2.6$  Hz), 6.55 (d, Ar-H, 1H,  $J = 2.2$  Hz), 4.54 - 4.44 (m, -OCH, 1H), 4.13 (t, -OCH<sub>2</sub>-, 2H,  $J = 6.5$  Hz), 1.87 - 1.29 (m, -CH<sub>2</sub>-, -CH<sub>3</sub>, 21H), 0.94 - 0.87 (m, -CH<sub>3</sub>, 6H). FT-IR (KBr):3430, 2925, 2860, 1678, 1616, 1502, 1250, 1190  $\text{cm}^{-1}$ . Elemental analysis for C<sub>34</sub>H<sub>43</sub>NO<sub>5</sub>(percent): calculated C, 74.83, H, 7.94, N, 2.57; found C, 74.83, H, 7.90, N, 2.56.

**OH-EI<sub>6</sub>-OH.**  $^1\text{H-NMR}$  (acetone- $d_6$ ):  $\delta$  (ppm) 13.81 (s, Ar-OH, 1H), 10.56 (s, Ar-OH, 1H), 8.94 (s, -CH=N-, 1H), 8.00 (d, Ar-H, 1H,  $J = 8.9$  Hz), 7.66 (d, Ar-H, 1H,  $J = 9.3$  Hz), 7.42 (d, Ar-H, 2H,  $J = 8.9$  Hz), 7.02 (d, Ar-H, 2H,  $J = 8.9$  Hz), 6.93 - 6.92 (m, Ar-H, 2H), 6.62 (dd, Ar-H, 1H,  $J = 9.0$  Hz,  $J = 2.3$  Hz), 6.54 (d, Ar-H, 1H,  $J = 2.3$  Hz), 4.57 - 4.47 (m, -OCH, 1H), 4.12 (t, -OCH<sub>2</sub>-, 2H,  $J = 6.5$  Hz), 1.84 - 1.30 (m, -CH<sub>2</sub>-,

**CH<sub>3</sub>**, 21H), 0.93 - 0.90 (m, -**CH<sub>3</sub>**, 6H). FT-IR (KBr): 3232, 2924, 2856, 1684, 1616, 1506, 1250, 1157 cm<sup>-1</sup>. Elemental analysis for C<sub>34</sub>H<sub>43</sub>NO<sub>6</sub> (percent): calculated C, 72.70, H, 7.72, N, 2.49; found C, 72.82, H, 7.74, N, 2.49.

**H-EI<sub>6</sub>-F**. <sup>1</sup>H-NMR (CDCl<sub>3</sub>): δ (ppm) 8.50 (s, -**CH=N-**, 1H), 7.96 (d, Ar-**H**, 2H, *J*=8.6 Hz), 7.86 (m, Ar-**H**, 1H), 7.34 (d, Ar-**H**, 2H, *J*=8.6 Hz), 7.23 (d, Ar-**H**, 2H, *J*=8.7 Hz), 6.92 (d, Ar-**H**, 2H, *J*=8.7 Hz), 6.84-6.80 (m, Ar-**H**, 1H), 4.38 - 4.35 (m, -**OCH**, 1H), 4.15 (t, -**OCH<sub>2</sub>-**, 2H, *J*=6.6 Hz), 1.90 - 1.31 (m, -**CH<sub>2</sub>-**, -**CH<sub>3</sub>**, 21H), 0.95 - 0.88 (m, -**CH<sub>3</sub>**, 6H). FT-IR (KBr): 2917, 2854, 1737, 1617, 1506, 1282, 1197, 1076 cm<sup>-1</sup>. Elemental analysis for C<sub>34</sub>H<sub>41</sub>F<sub>2</sub>NO<sub>4</sub> (percent): calculated C, 72.19, H, 7.31, N, 2.48; found C, 71.31, H, 7.43, N, 2.20.

**OH-EI<sub>6</sub>-F**. <sup>1</sup>H-NMR (CDCl<sub>3</sub>): δ (ppm) 13.8 (s, Ar-**OH**, 1H) 8.63 (s, -**CH=N-**, 1H), 7.84 (m, Ar-**H**, 1H), 7.42 (d, Ar-**H**, 1H, *J*=8.4 Hz), 7.28 - 7.26 (d, Ar-**H**, 2H), 6.94 (d, Ar-**H**, 2H, *J*=8.8 Hz), 6.90 (d, Ar-**H**, 1H, *J*=2.2 Hz), 6.85 - 6.82 (m, Ar-**H**, 2H), 4.41 - 4.35 (m, -**OCH**, 1H), 4.15 (t, -**OCH<sub>2</sub>-**, 2H, *J*=6.6 Hz), 1.91 - 1.30 (m, -**CH<sub>2</sub>-**, -**CH<sub>3</sub>**, 21H), 0.95 - 0.88 (m, -**CH<sub>3</sub>**, 6H). FT-IR (KBr): 2919, 2854, 1731, 1616, 1509, 1255, 1195, 1078 cm<sup>-1</sup>. Elemental analysis for C<sub>34</sub>H<sub>41</sub>F<sub>2</sub>NO<sub>5</sub> (percent): calculated C, 70.20, H, 7.10, N, 2.41; found C, 70.39, H, 7.28, N, 2.16.

**B1**. <sup>1</sup>H-NMR (CDCl<sub>3</sub>): δ (ppm) 8.33 (d, Ar-**H**, 2H, *J* = 9.3 Hz), 8.14 (d, Ar-**H**, 2H, *J* = 8.9 Hz), 7.41 (d, Ar-**H**, 2H, *J* = 9.3 Hz), 7.00 (d, Ar-**H**, 2H, *J* = 9.0 Hz), 4.07 (t, -**OCH<sub>2</sub>**, 2H, *J* = 6.6 Hz), 1.88-1.79 (m, -**CH<sub>2</sub>-**, 2H), 1.53-1.34 (m, -**CH<sub>2</sub>-**, 6H), 0.93 (t, -**CH<sub>3</sub>**, 3H, *J* = 7.4 Hz).

**B2**. <sup>1</sup>H-NMR (CDCl<sub>3</sub>): δ (ppm) 10.42 (s, -**OH**, 1H), 8.35 (d, Ar-**H**, 2H, *J* = 9.3 Hz), 7.94 (d, Ar-**H**, 1H, *J* = 8.9 Hz), 7.42 (d, Ar-**H**, 2H, *J* = 9.0 Hz), 6.55 (dd, Ar-**H**, 1H, *J* = 2.6 Hz, *J* = 8.9 Hz), 6.51 (d, Ar-**H**, 1H, *J* = 2.6 Hz), 4.03 (t, -**OCH<sub>2</sub>**, 2H, *J* = 6.5 Hz), 1.87-1.77 (m, -**CH<sub>2</sub>-**, 2H), 1.51-1.34 (m, -**CH<sub>2</sub>-**, 6H), 0.93 (t, -**CH<sub>3</sub>**, 3H, *J* = 7.1 Hz).

**B3**. <sup>1</sup>H-NMR (CDCl<sub>3</sub>): δ (ppm) 8.34 (d, Ar-**H**, 2H, *J* = 9.3 Hz), 7.89-7.83 (m, Ar-**H**, 1H), 7.44 (d, Ar-**H**, 2H, *J* = 9.3 Hz), 6.89-6.83 (m, Ar-**H**, 1H), 4.18-4.10 (m, -**OCH<sub>2</sub>**, 2H), 1.94-1.85 (m, -**CH<sub>2</sub>-**, 8H), 0.93 (t, -**CH<sub>3</sub>**, 3H, *J* = 7.0 Hz).

**C1.**  $^1\text{H-NMR}$  ( $\text{CDCl}_3$ ):  $\delta$  (ppm) 8.13 (d, Ar-H, 2H,  $J = 9.2$  Hz), 6.98 (t, Ar-H, 4H,  $J = 8.7$  Hz), 6.72 (d, Ar-H, 2H,  $J = 8.8$  Hz), 4.04 (t,  $-\text{OCH}_2$ , 2H,  $J = 6.6$  Hz), 1.87-1.78 (m,  $-\text{CH}_2$ -, 2H), 1.53-1.26 (m,  $-\text{CH}_2$ -, 6H), 0.92 (t,  $-\text{CH}_3$ , 3H,  $J = 7.0$  Hz).

**C2.**  $^1\text{H-NMR}$  ( $\text{CDCl}_3$ ):  $\delta$  (ppm) 10.80 (d,  $-\text{OH}$ , 1H,  $J = 11.6$  Hz), 7.94 (d, Ar-H, 1H,  $J = 8.7$  Hz), 7.00-6.96 (m, Ar-H, 2H), 6.72 (d, Ar-H, 1H,  $J = 8.9$  Hz), 6.61 (d, Ar-H, 1H,  $J = 8.9$  Hz), 6.52-6.47 (m, Ar-H, 2H), 4.01 (t,  $-\text{OCH}_2$ , 2H,  $J = 6.6$  Hz), 1.85-1.76 (m,  $-\text{CH}_2$ -, 2H), 1.52-1.32 (m,  $-\text{CH}_2$ -, 6H), 0.92 (t,  $-\text{CH}_3$ , 3H,  $J = 7.0$  Hz).

**C3.**  $^1\text{H-NMR}$  ( $\text{CDCl}_3$ ):  $\delta$  (ppm) 7.85-7.79 (m, Ar-H, 1H), 7.00 (d, Ar-H, 2H,  $J = 8.6$  Hz), 6.84-6.78 (m, Ar-H, 1H), 6.71 (d, Ar-H, 2H,  $J = 8.6$  Hz), 4.15-4.07 (m,  $-\text{OCH}_2$ , 2H), 1.91-1.26 (m,  $-\text{CH}_2$ -, 8H), 0.92 (t,  $-\text{CH}_3$ , 3H,  $J = 7.0$  Hz).

**D1.**  $^1\text{H-NMR}$  ( $\text{CDCl}_3$ ):  $\delta$  (ppm) 9.87 (s, Ar-CHO, 1H), 7.82 (d, Ar-H, 2H,  $J = 8.9$  Hz), 6.97 (d, Ar-H, 2H,  $J = 8.9$  Hz), 4.49 (m,  $-\text{OCH}$ , 1H), 1.83-1.18 (m,  $-\text{CH}_2$ -,  $-\text{CH}_3$ , 13H), 0.88 (t,  $-\text{CH}_3$ , 3H,  $J = 6.8$  Hz).

**D2.**  $^1\text{H-NMR}$  ( $\text{CDCl}_3$ ):  $^1\text{H-NMR}$  ( $\text{CDCl}_3$ ):  $\delta$  (ppm) 11.49 (s, Ar-OH, 1H), 9.70 (s, Ar-CHO, 1H), 7.42 (d, Ar-H, 2H,  $J = 8.9$  Hz), 6.51 (dd, Ar-H, 2H,  $J = 8.9$  Hz,  $J = 2.2$  Hz), 4.48 (m,  $-\text{OCH}$ , 1H), 1.82-1.20 (m,  $-\text{CH}_2$ -,  $-\text{CH}_3$ , 13H), 0.89 (t,  $-\text{CH}_3$ , 3H,  $J = 7.0$  Hz).

**H-EIII<sub>6</sub>.**  $^1\text{H-NMR}$  ( $\text{CDCl}_3$ ):  $\delta$  (ppm) 8.40 (s,  $-\text{CH}=\text{N}$ -, 1H), 7.84 (d, Ar-H, 2H,  $J = 8.6$  Hz), 7.23 (d, Ar-H, 4H,  $J = 3.4$  Hz), 6.98 (dd, Ar-H, 4H,  $J = 8.6$  Hz,  $J = 5.2$  Hz), 4.51-4.42 (m,  $-\text{OCH}$ , 1H), 4.06 (t,  $-\text{OCH}_2$ , 2H,  $J = 6.6$  Hz), 1.88-1.26 (m,  $-\text{CH}_2$ -,  $-\text{CH}_3$ , 21H), 0.95-0.84 (m,  $-\text{CH}_3$ , 6H). FT-IR (KBr): 2925, 2857, 1725, 1604, 1567, 1504, 1245, 1159, 1056  $\text{cm}^{-1}$ . Elemental analysis for  $\text{C}_{34}\text{H}_{43}\text{NO}_4$  (percent): calculated C, 77.09, H, 8.18, N, 2.64; found C, 77.23, H, 8.32, N, 2.46.

**OH-EIII<sub>6</sub>.**  $^1\text{H-NMR}$  (Acetone- $d_6$ ):  $\delta$  (ppm) 13.47 (s,  $-\text{OH}$ , 1H), 8.83 (d,  $-\text{CH}=\text{N}$ -, 1H,  $J = 2.4$  Hz), 8.13 (d, Ar-H, 2H,  $J = 8.9$  Hz), 7.46 (d, Ar-H, 3H,  $J = 9.1$  Hz), 7.33 (d, Ar-H, 2H,  $J = 9.0$  Hz), 7.11 (d, Ar-H, 2H,  $J = 8.9$  Hz), 6.56 (dd, Ar-H, 1H,  $J = 8.7$  Hz,  $J = 2.6$  Hz), 6.47 (d, Ar-H, 1H,  $J = 2.3$  Hz), 4.63-4.53 (m,  $-\text{OCH}$ , 1H), 4.14 (t,  $-\text{OCH}_2$ , 2H,  $J = 6.5$  Hz), 1.88-1.30 (m,  $-\text{CH}_2$ -,  $-\text{CH}_3$ , 21H), 0.94-0.86 (m,  $-\text{CH}_3$ , 6H). FT-IR (KBr): 3741, 2919, 2856, 1720, 1614, 1506, 1259, 1174  $\text{cm}^{-1}$ . Elemental analysis for  $\text{C}_{34}\text{H}_{43}\text{NO}_5$  (percent): calculated C, 74.83, H, 7.94, N, 2.57; found C, 74.82, H, 7.91, N, 2.55.

**H-EIII<sub>6</sub>-OH.** <sup>1</sup>H-NMR (Acetone-*d*<sub>6</sub>):  $\delta$  (ppm) 10.67 (s, -OH, 1H), 8.56 (d, -CH=N-, 1H), 8.02 (d, Ar-H, 2H,  $J = 8.9$  Hz), 7.92 (d, Ar-H, 2H,  $J = 8.9$  Hz), 7.34 (s, Ar-H, 4H), 7.07 (d, Ar-H, 2H,  $J = 8.9$  Hz), 6.63 (dd, Ar-H, 1H,  $J = 8.9$  Hz,  $J = 2.3$  Hz), 6.54 (d, Ar-H, 1H,  $J = 2.5$  Hz), 4.67-4.56 (m, -OCH, 1H), 4.12 (t, -OCH<sub>2</sub>, 2H,  $J = 6.5$  Hz), 1.87-1.31 (m, -CH<sub>2</sub>-, -CH<sub>3</sub>, 21H), 0.94-0.86 (m, -CH<sub>3</sub>, 6H). FT-IR (KBr): 3739, 2927, 2858, 1671, 1617, 1504, 1254, 1192 cm<sup>-1</sup>. Elemental analysis for C<sub>34</sub>H<sub>43</sub>NO<sub>5</sub> (percent): calculated C, 74.83, H, 7.94, N, 2.57; found C, 74.64, H, 7.97, N, 2.53.

**OH-EIII<sub>6</sub>-OH.** <sup>1</sup>H-NMR (Acetone-*d*<sub>6</sub>):  $\delta$  (ppm) 13.41 (s, -OH, 1H), 10.61 (s, -OH, 1H), 8.82 (d, -CH=N-, 1H,  $J = 2.9$  Hz), 8.00 (d, Ar-H, 1H,  $J = 8.9$  Hz), 7.48-7.46 (m, Ar-H, 3H), 7.37 (d, Ar-H, 2H,  $J = 8.9$  Hz), 6.61 (dd, Ar-H, 1H,  $J = 9.1$  Hz,  $J = 2.4$  Hz), 6.55-6.53 (m, Ar-H, 2H), 6.46 (d, Ar-H, 1H,  $J = 2.3$  Hz), 4.59-4.55 (m, -OCH, 1H), 4.11 (t, -OCH<sub>2</sub>, 2H,  $J = 6.5$  Hz), 1.83-1.31 (m, -CH<sub>2</sub>-, -CH<sub>3</sub>, 21H), 0.92-0.87 (m, -CH<sub>3</sub>, 6H). FT-IR (KBr): 3469, 2921, 2857, 1672, 1623, 1509, 1261, 1186 cm<sup>-1</sup>. Elemental analysis for C<sub>34</sub>H<sub>43</sub>NO<sub>6</sub> (percent): calculated C, 72.70, H, 7.72, N, 2.49; found C, 72.81, H, 7.89, N, 2.39.

**H-EIII<sub>6</sub>-F.** <sup>1</sup>H-NMR (Acetone-*d*<sub>6</sub>):  $\delta$  (ppm) 8.55 (s, -CH=N-, 1H), 7.92 (d, Ar-H, 3H,  $J = 8.8$  Hz), 7.36-7.29 (m, Ar-H, 4H), 7.23-7.17 (m, Ar-H, 1H), 7.07 (d, Ar-H, 2H,  $J = 8.9$  Hz), 4.66-4.56 (m, -OCH, 1H), 4.29 (t, -OCH<sub>2</sub>, 2H,  $J = 6.5$  Hz), 1.93-1.30 (m, -CH<sub>2</sub>-, -CH<sub>3</sub>, 21H), 0.95-0.87 (m, -CH<sub>3</sub>, 6H). FT-IR (KBr): 2927, 2857, 1735, 1617, 1509, 1471, 1251, 1243 cm<sup>-1</sup>. Elemental analysis for C<sub>34</sub>H<sub>41</sub>F<sub>2</sub>NO<sub>4</sub> (percent): calculated C, 72.19, H, 7.31, N, 2.48; found C, 72.07, H, 7.49, N, 2.35.

**OH-EIII<sub>6</sub>-F.** <sup>1</sup>H-NMR (Acetone-*d*<sub>6</sub>):  $\delta$  (ppm) 13.46 (s, -OH, 1H), 8.84 (d, -CH=N-, 1H,  $J = 2.6$  Hz), 7.97-7.90 (m, Ar-H, 1H), 7.51-7.46 (m, Ar-H, 3H), 7.37 (d, Ar-H, 2H,  $J = 8.9$  Hz), 7.23-7.17 (m, Ar-H, 1H), 6.56 (dd, Ar-H, 1H,  $J = 8.5$  Hz,  $J = 2.5$  Hz), 6.48 (d, Ar-H, 1H,  $J = 2.6$  Hz), 4.64-4.54 (m, -OCH, 1H), 4.29 (t, -OCH<sub>2</sub>, 2H,  $J = 6.5$  Hz), 1.93-1.29 (m, -CH<sub>2</sub>-, -CH<sub>3</sub>, 21H), 0.94-0.87 (m, -CH<sub>3</sub>, 6H). FT-IR (KBr): 3448, 2929, 2861, 1722, 1625, 1511, 1251, 1178 cm<sup>-1</sup>. Elemental analysis for C<sub>34</sub>H<sub>41</sub>F<sub>2</sub>NO<sub>5</sub> (percent): calculated C, 70.20, H, 7.10, N, 2.41; found C, 70.03, H, 7.18, N, 2.32.

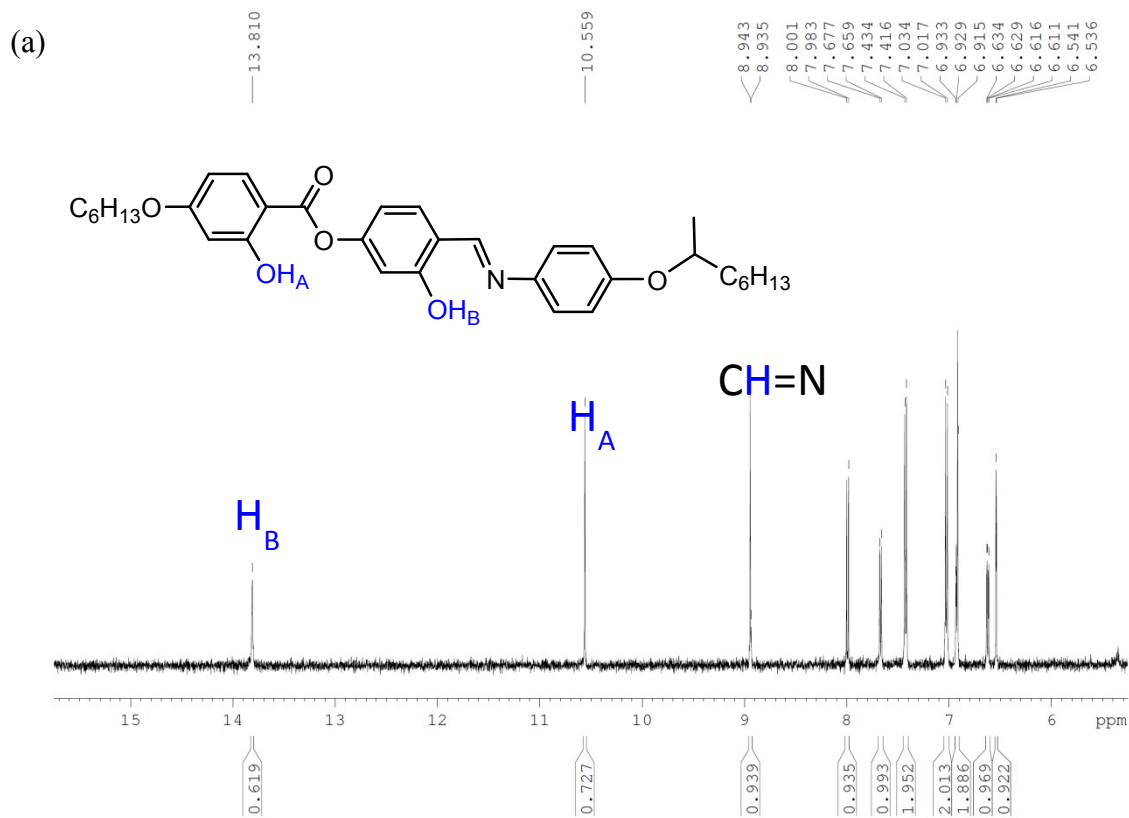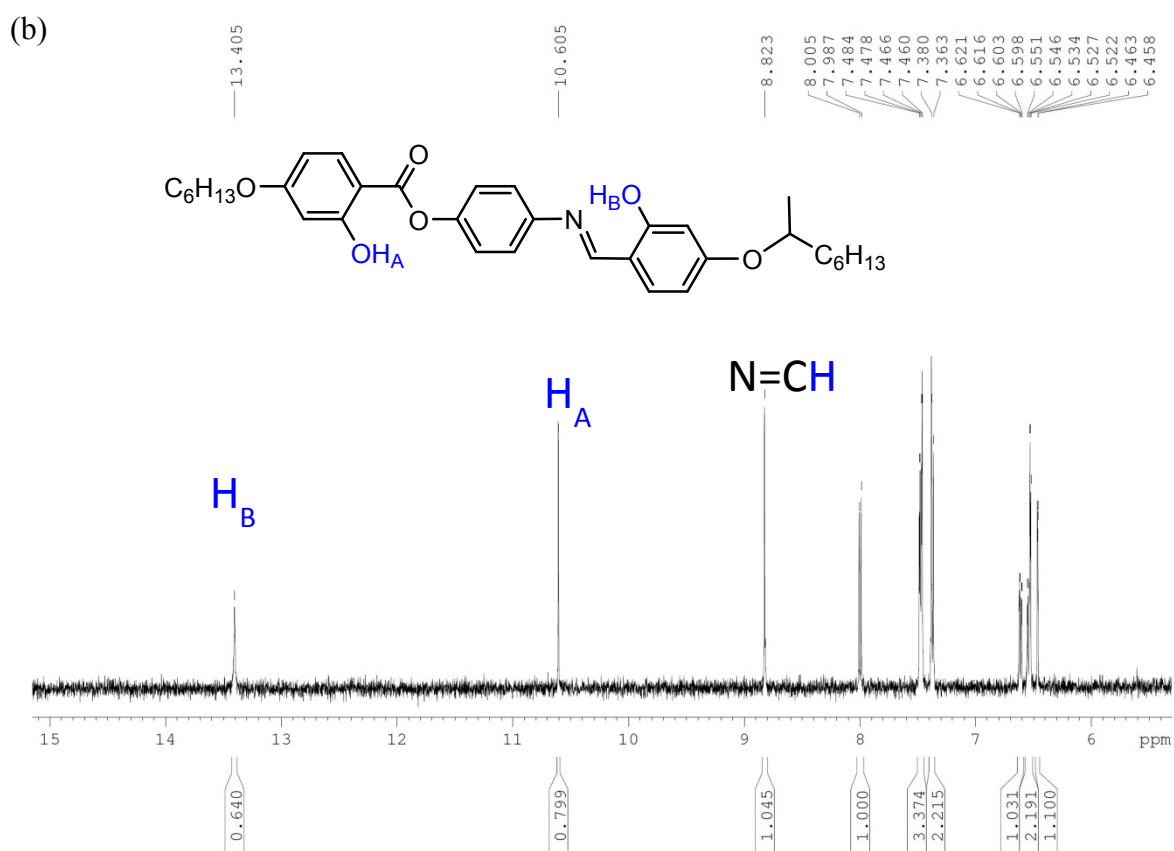

**Figure S1** The  $^1\text{H}$  NMR spectra of Schiff base compounds **OH-EI<sub>6</sub>-OH** (a) and **OH-EIII<sub>6</sub>-OH** (b) in the range of 6-15 ppm

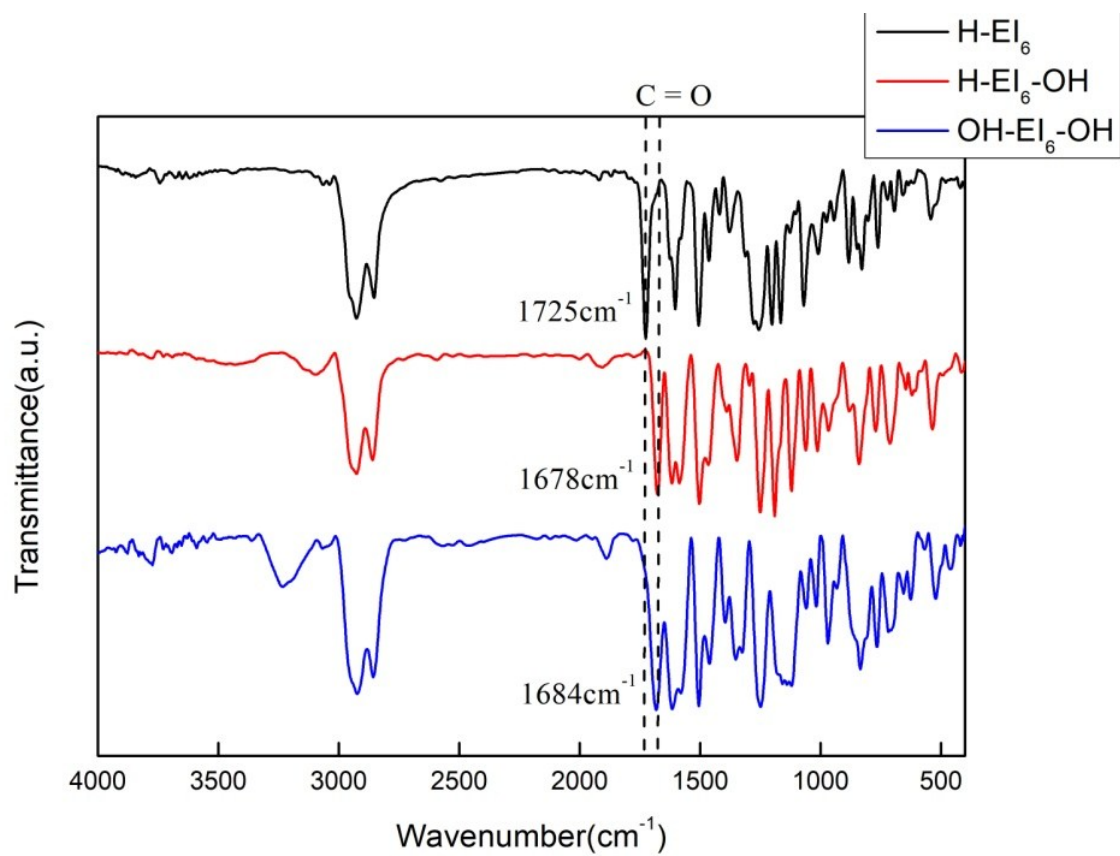

**Figure S2** FT-IR spectra of Schiff base compounds  $\text{H-EI}_6$ ,  $\text{H-EI}_6\text{-OH}$  and  $\text{OH-EI}_6\text{-OH}$

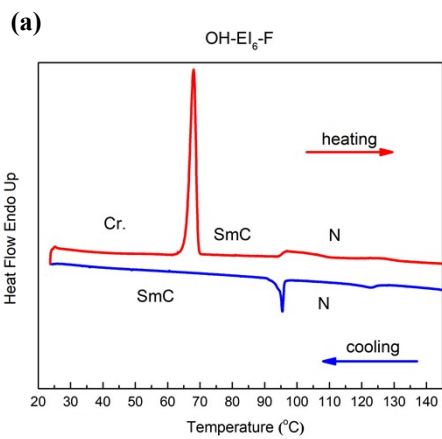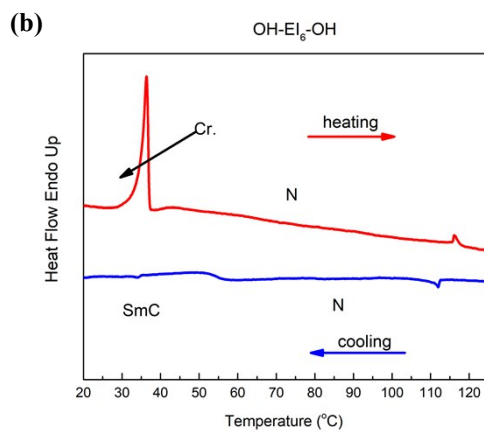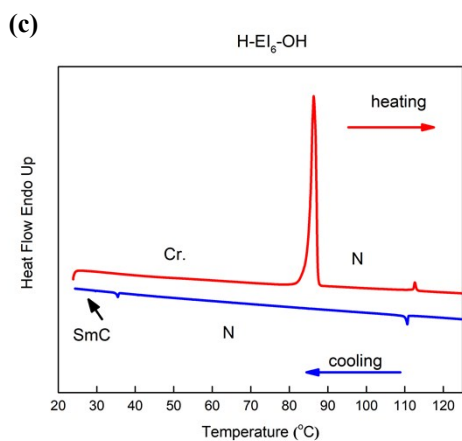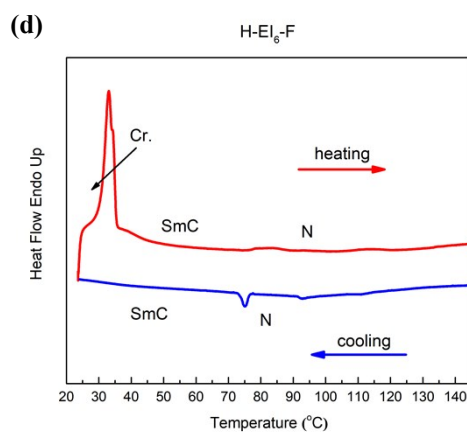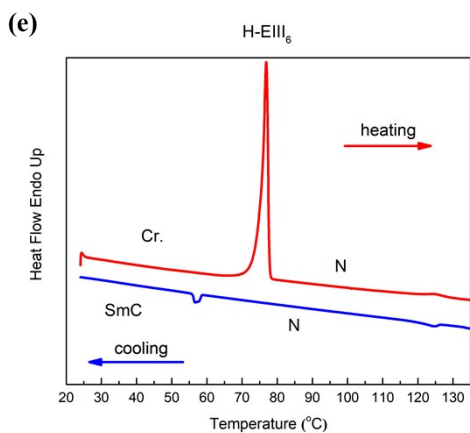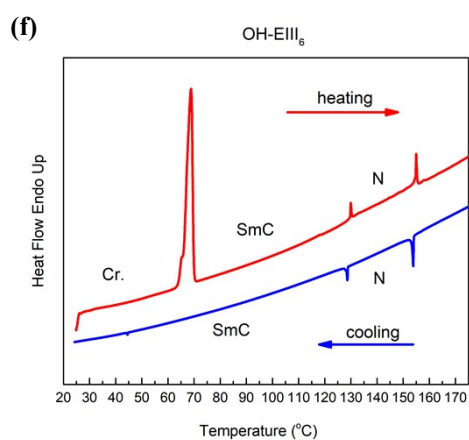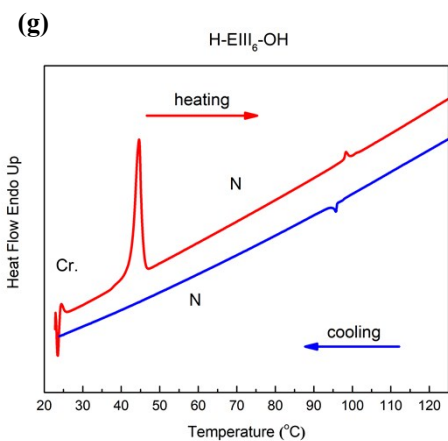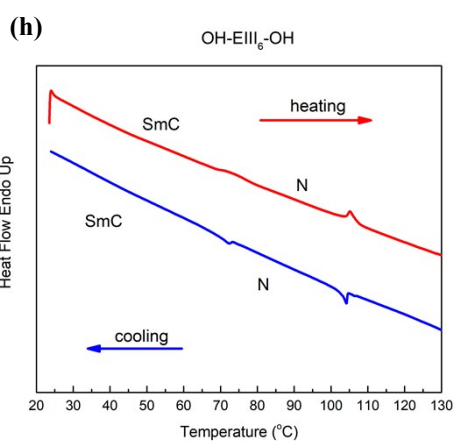



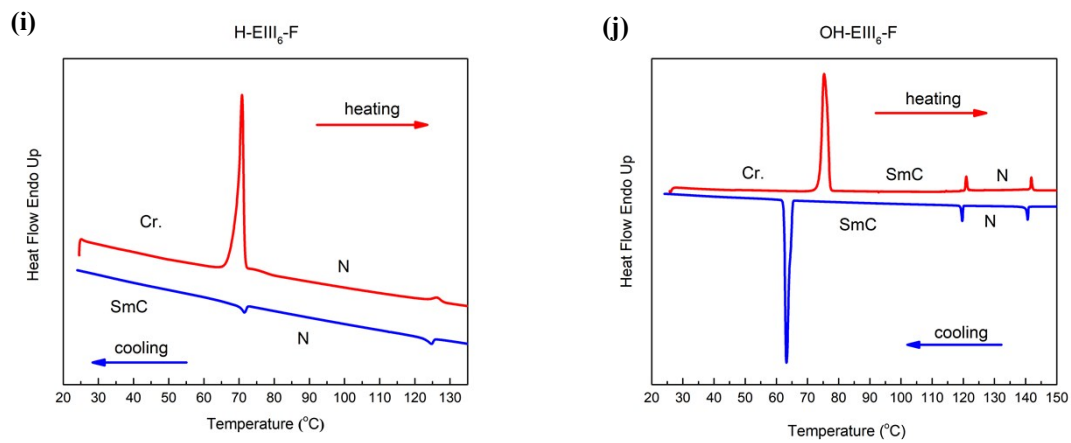

**Figure S3** The DSC measurements of all racemic Schiff base mesogens on heating and cooling recycle.

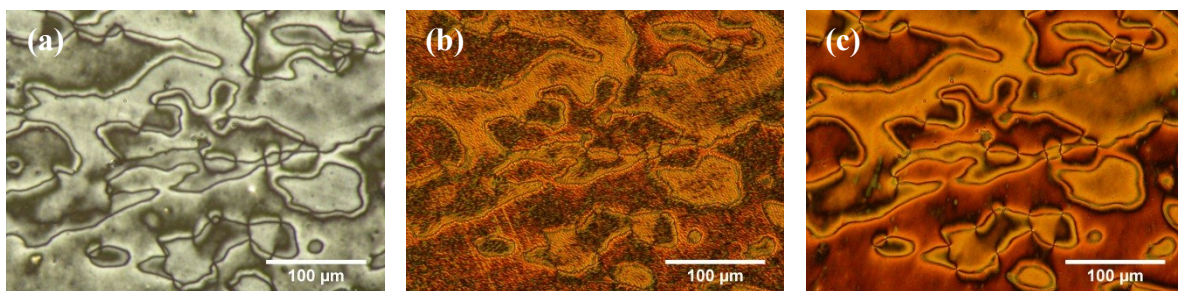

**Figure S4** Microphotographs for compound **H-El<sub>6</sub>-OH** : (a) N texture at 109.0°C; (b) N-SmC texture at 37.2°C; (c) SmC texture at 36.0°C.

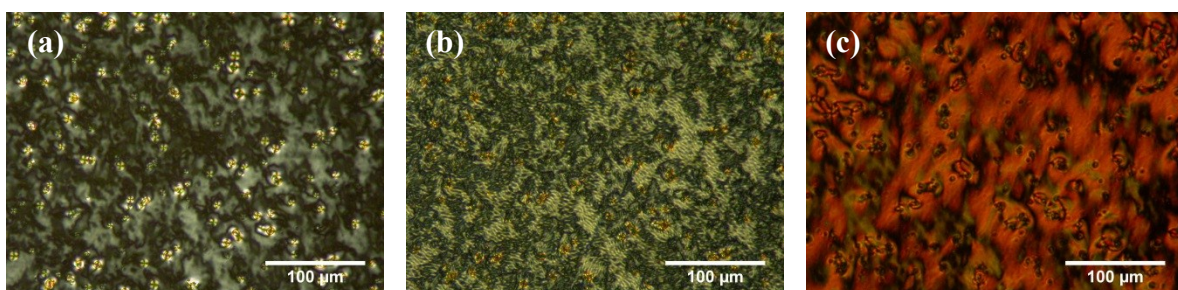

**Figure S5** Microphotographs for compound **OH-EIII<sub>6</sub>-OH** : (a) N texture at 99.6°C; (b) N-SmC texture at 78.5°C; (c) SmC texture at 30.0°C.

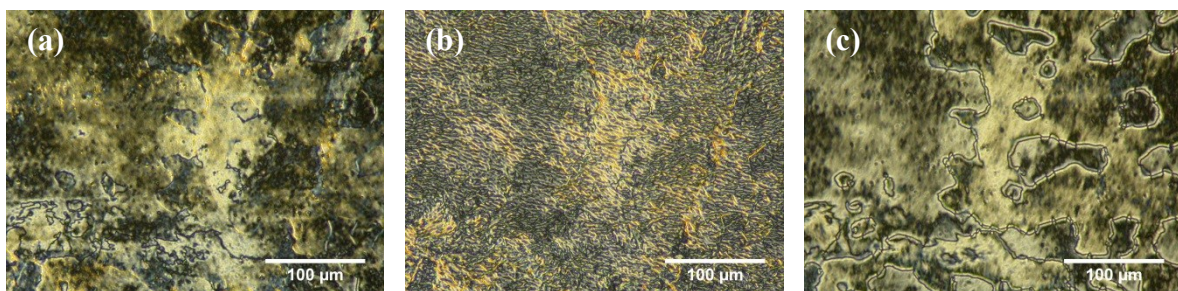

**Figure S6** Microphotographs for compound **OH-EIII<sub>6</sub>-F** : (a) N texture at 129.7°C; (b) N-SmC texture at 108.2°C; (c) SmC texture at 59.6°C.

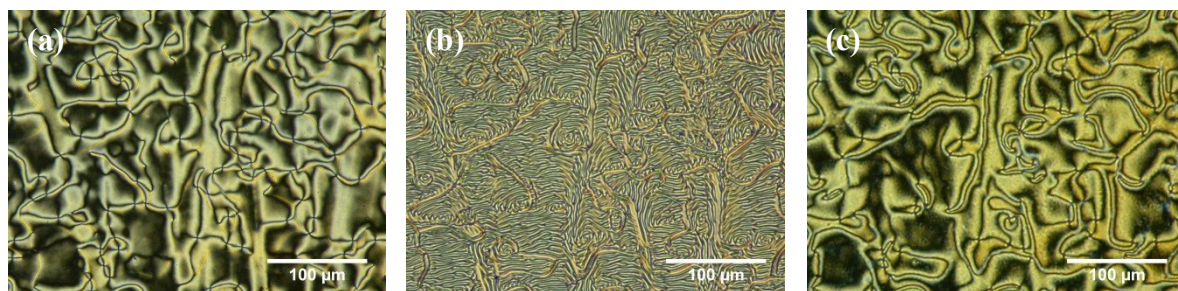

**Figure S7** Microphotographs for compound **H-EIII<sub>6</sub>-F** : (a) N texture at 99.6°C; (b) N-SmC texture at 78.5°C; (c) SmC texture at 36.0°C.

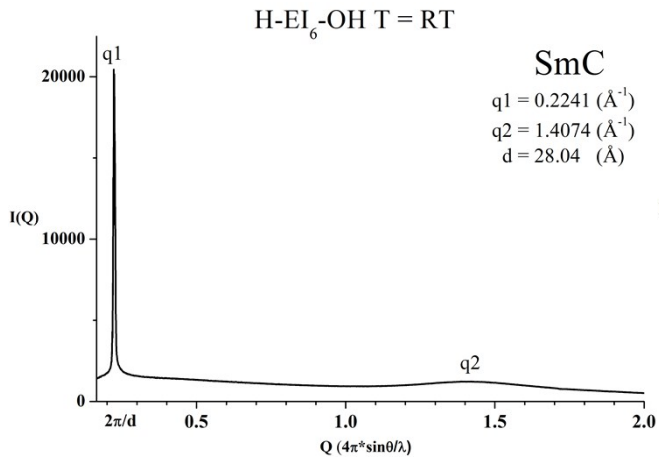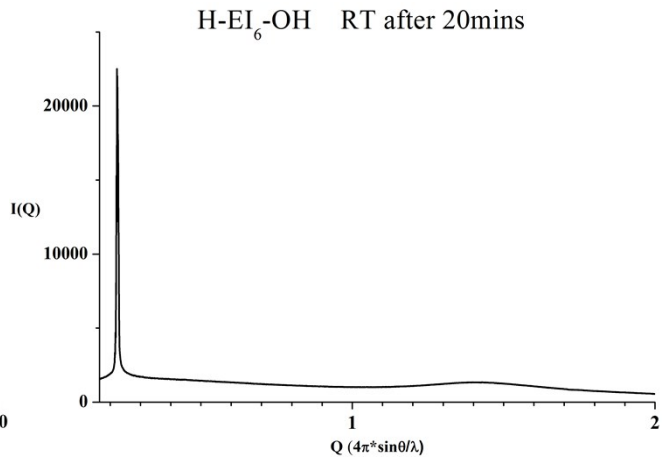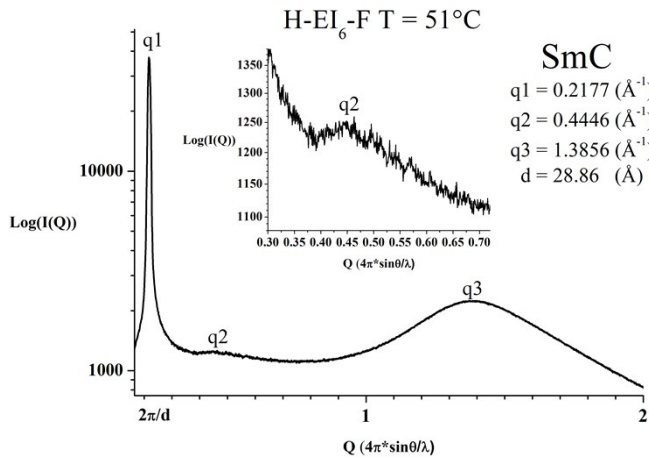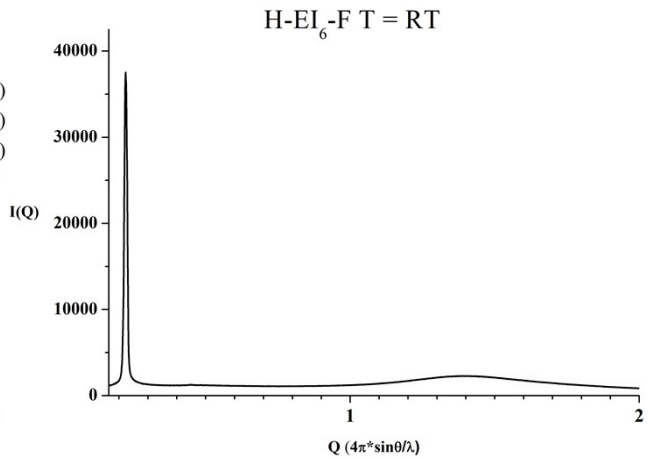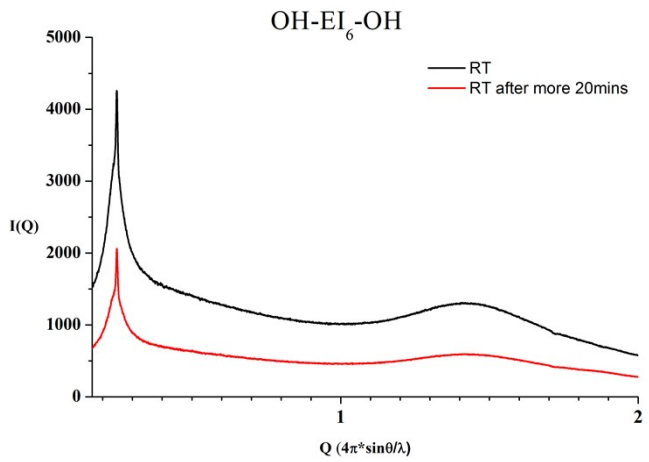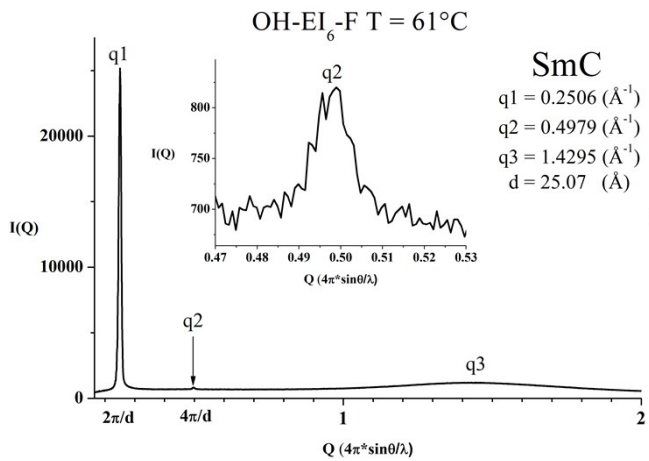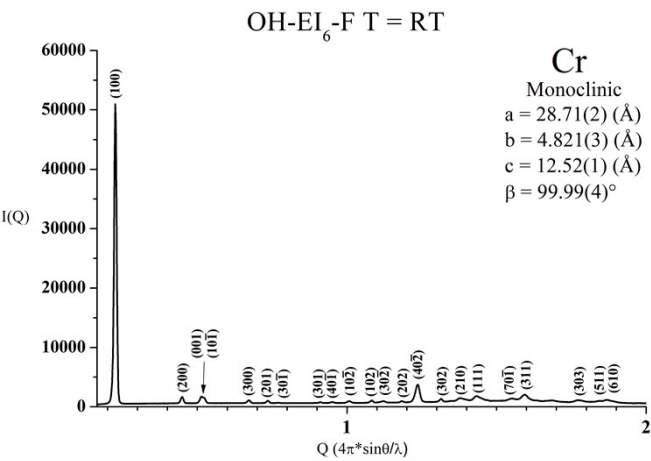

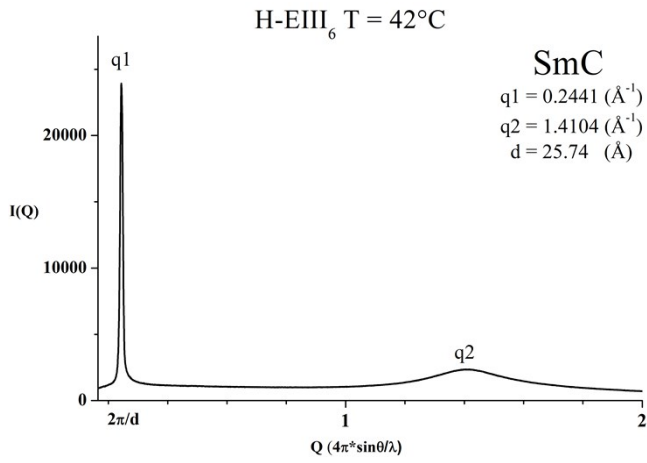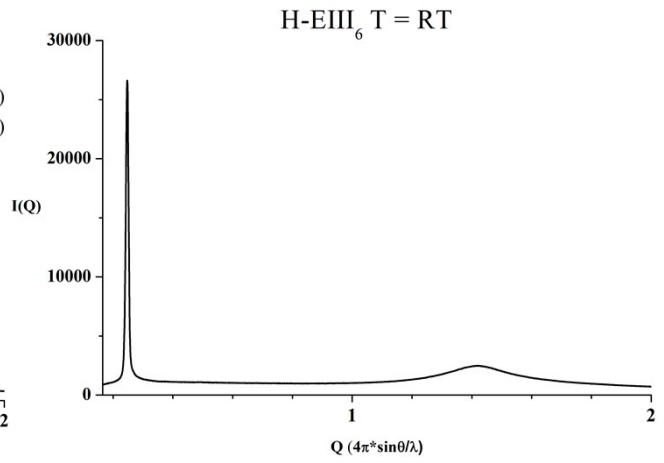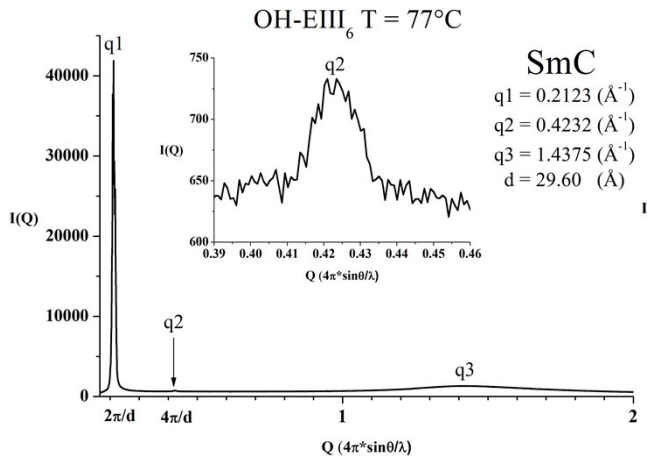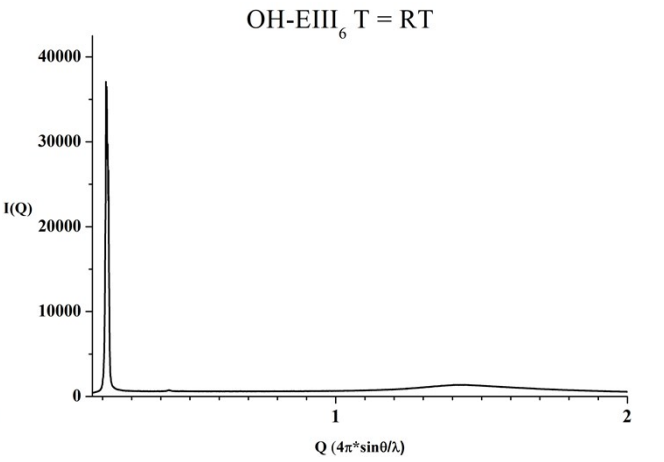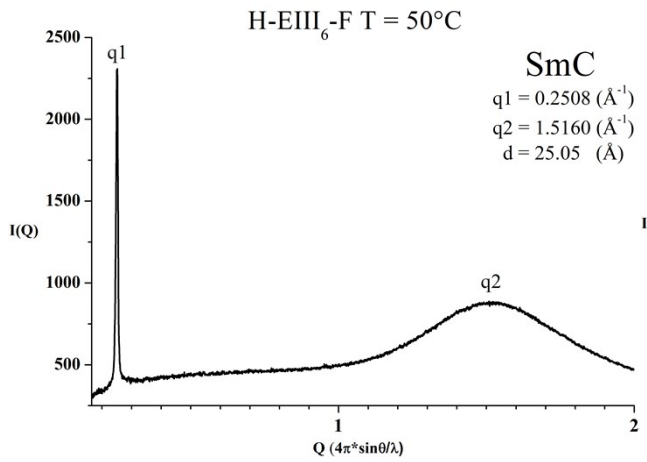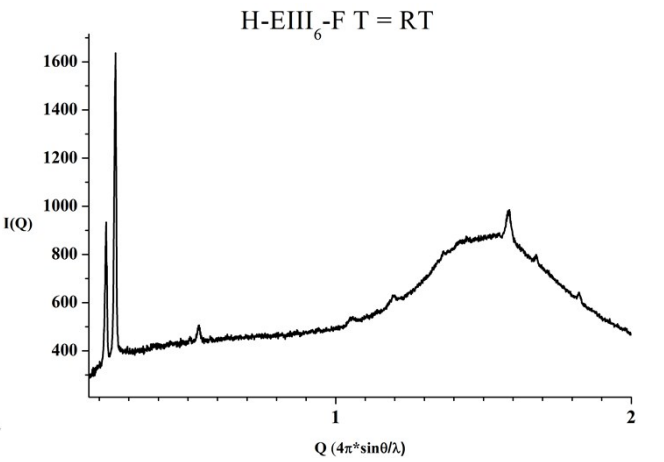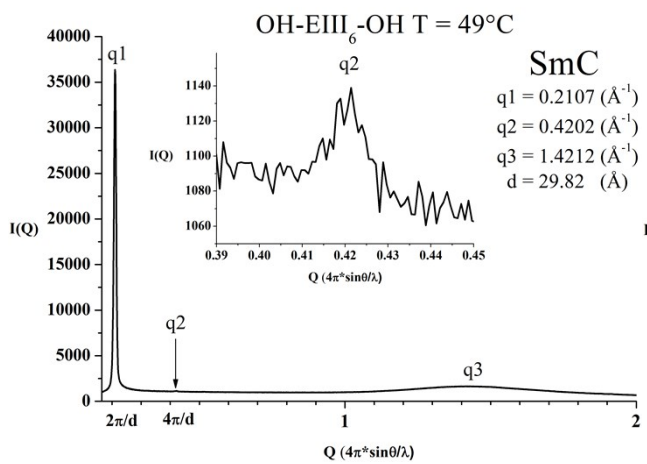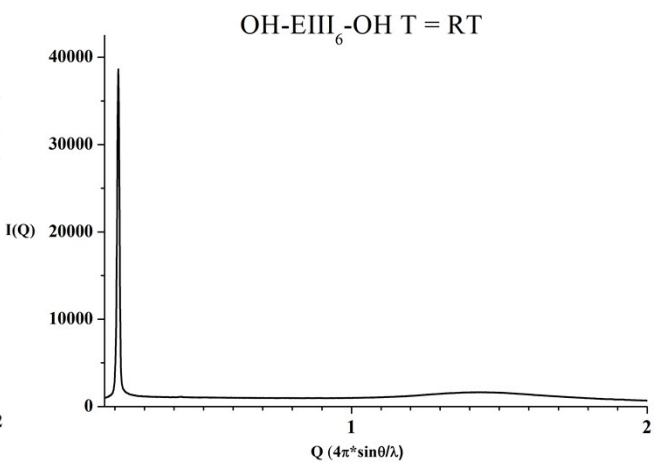

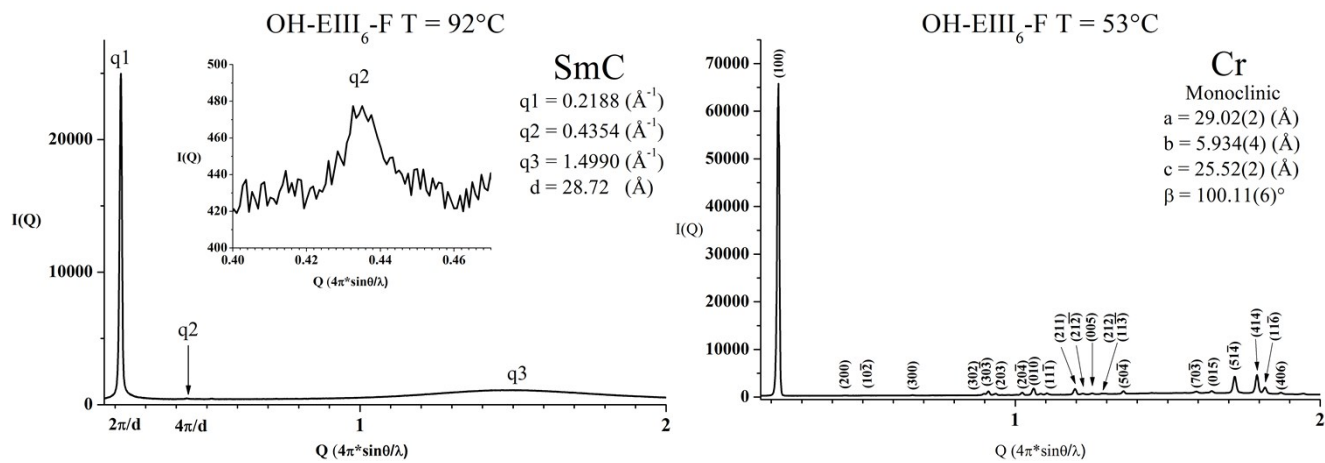

**Figure S8** The variable – temperature XRD measurements for Schiff base mesogens.

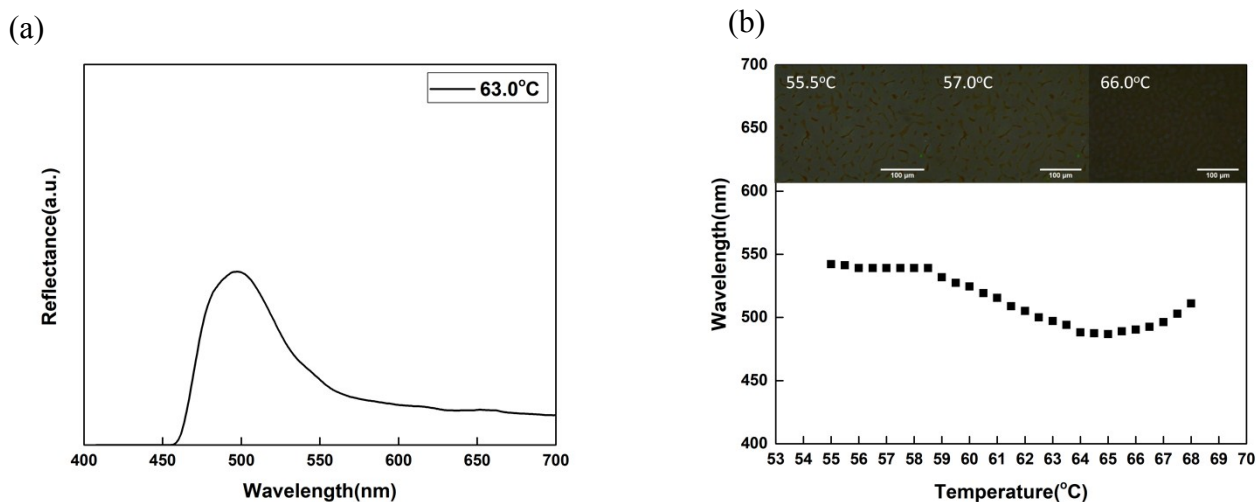

**Figure S9** (a) A typical shape of the reflection spectrum (b) The temperature dependence of the Bragg reflection wavelength for the blending mixture consisting of **H-EI<sub>6</sub>-F** + 30% **S811** at cooling rate with 0.2 °C min<sup>-1</sup>. The inset shows the POM image of BPs at different temperature.

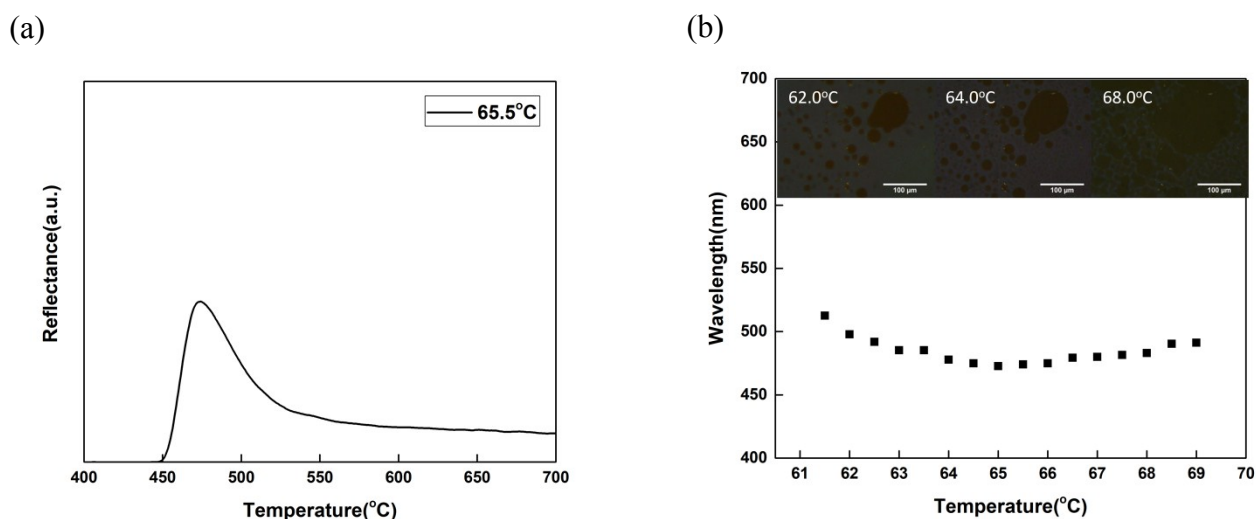

**Figure S10** (a) Temperature dependence of typical reflectance profile (b) The temperature dependence of the Bragg reflection wavelength for the blending mixture consisting of **H-EI<sub>6</sub>-F** + 30% **S811** at a heating rate with 0.2 °C min<sup>-1</sup>. The inset shows the POM image of BPs at different temperature.

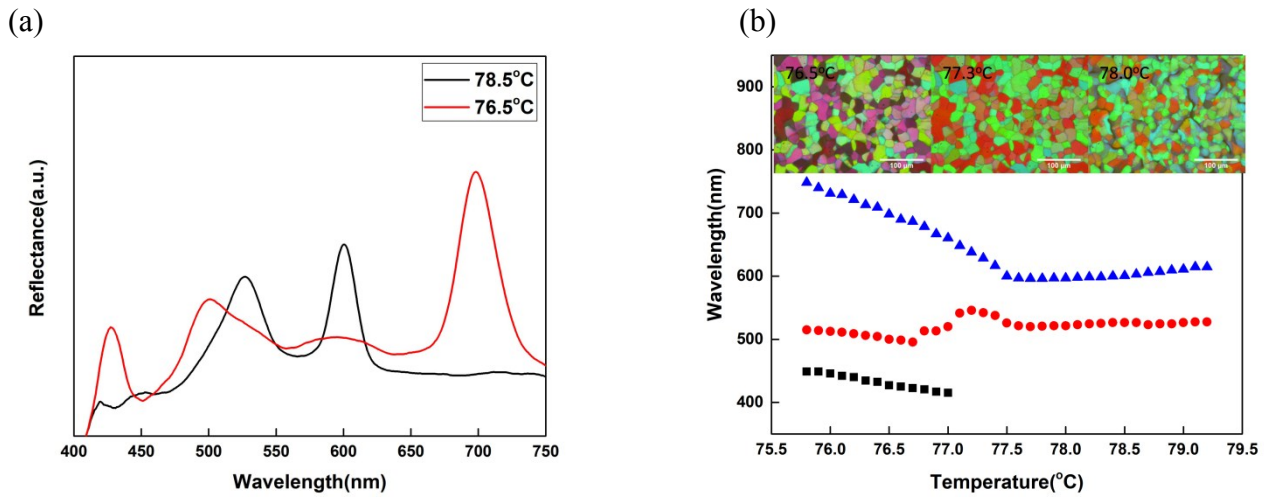

**Figure S11** (a) typical shapes of the reflection spectra (b) The temperature dependence of the Bragg reflection wavelength for the blending mixture consisting of **OH-EI<sub>6</sub>-OH + 25% S811** at a cooling rate with  $0.2\text{ }^{\circ}\text{C min}^{-1}$ . The inset shows the POM image of BPs at different temperature.

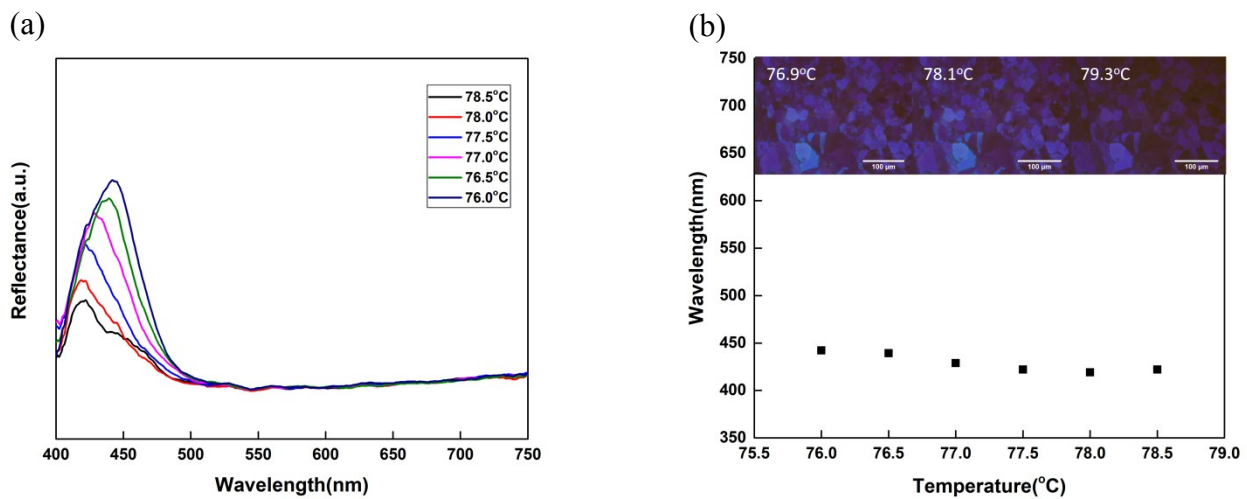

**Figure S12** (a) Temperature dependence of typical reflectance profile (b) The temperature dependence of the Bragg reflection wavelength for the blending mixture consisting of **H-EI<sub>6</sub>-OH + 10% ISO(6OBA)<sub>2</sub>** at a heating rate with  $0.2\text{ }^{\circ}\text{C min}^{-1}$ . The inset shows the POM image of BPs at different temperature.

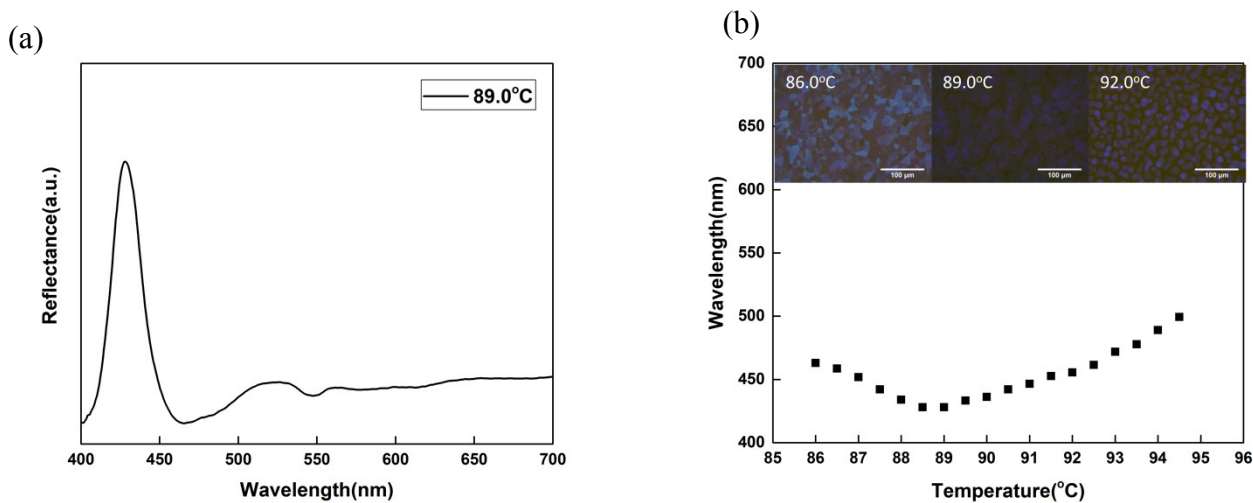

**Figure S13** (a) Temperature dependence of typical reflectance profile (b) The temperature dependence of the Bragg reflection wavelength for the blending mixture consisting of **OH-EI<sub>6</sub>-OH + 10% ISO(6OBA)<sub>2</sub>** at a cooling rate with 0.2 °C min<sup>-1</sup>. The inset shows the POM image of BPs at different temperature.

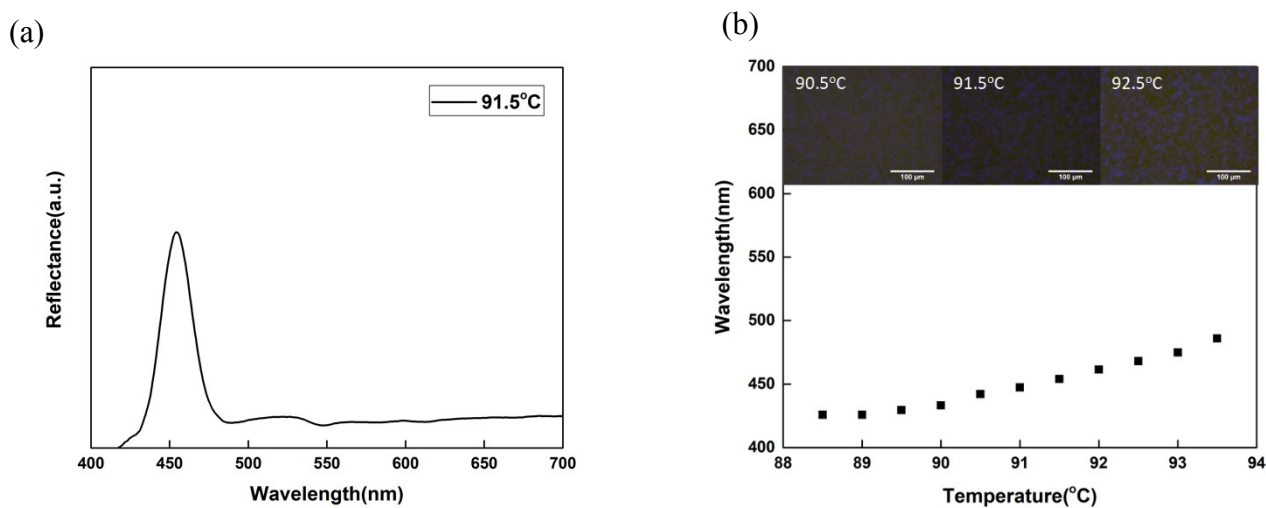

**Figure S14** (a) Temperature dependence of typical reflectance profile (b) The temperature dependence of the Bragg reflection wavelength for the blending mixture consisting of **OH-EI<sub>6</sub>-OH + 10% ISO(6OBA)<sub>2</sub>** at a heating rate of 0.2 °C min<sup>-1</sup>. The inset shows the POM image of BPs at different temperature.



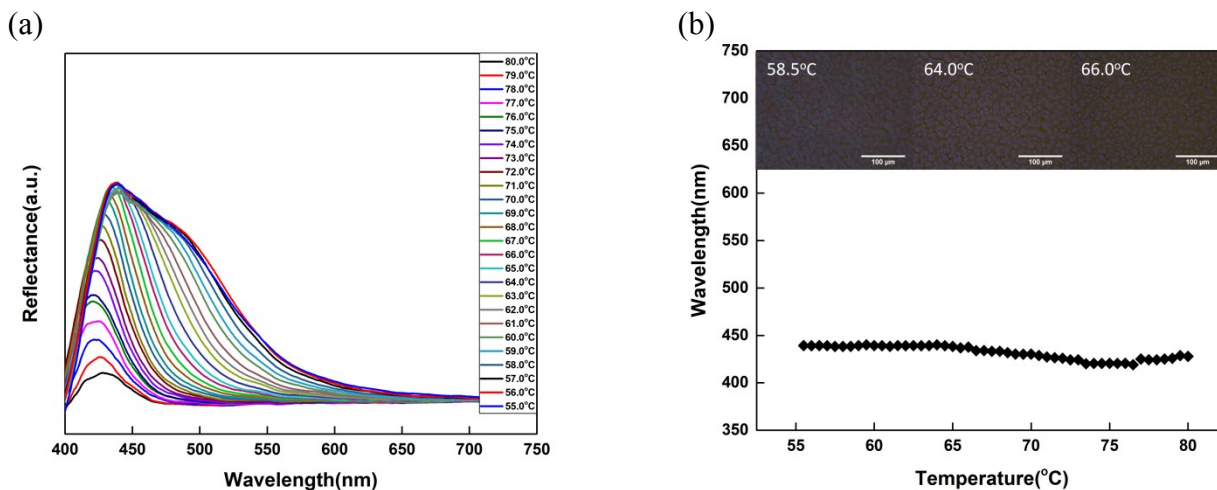

**Figure S15** (a) Temperature dependence of typical reflectance profile (b) The temperature dependence of the Bragg reflection wavelength for the blending mixture consisting of **H-EI<sub>6</sub>-F + 10% ISO(6OBA)<sub>2</sub>** at a cooling rate with 0.2 °C min<sup>-1</sup>. The inset shows the POM image of BPs at different temperature.

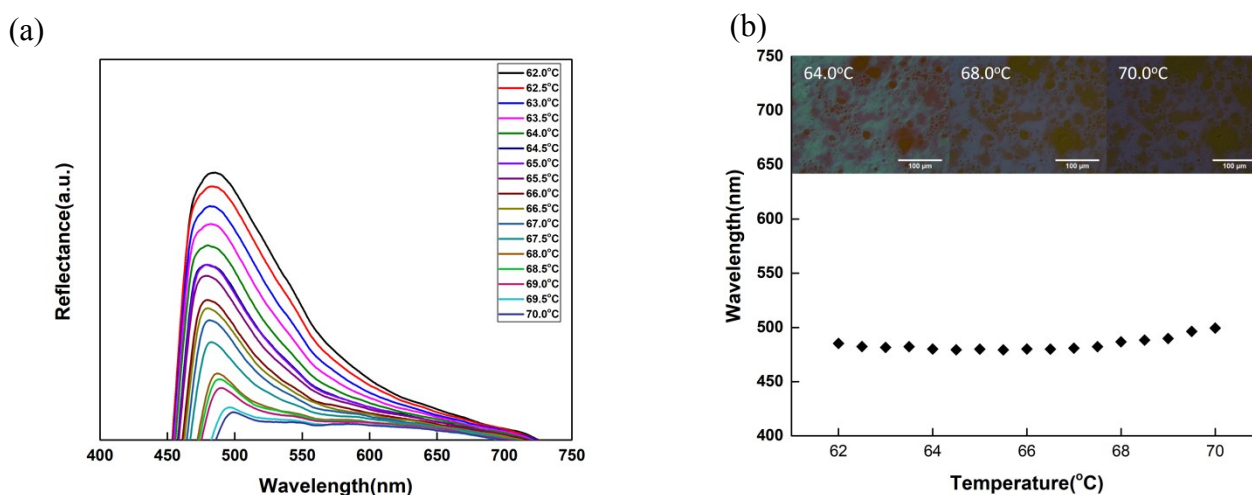

**Figure S16** (a) Temperature dependence of typical reflectance profile (b) The temperature dependence of the Bragg reflection wavelength for the blending mixture consisting of **H-EI<sub>6</sub>-F + 10% ISO(6OBA)<sub>2</sub>** at a heating with 0.2 °C min<sup>-1</sup>. The inset shows the POM image of BPs at different temperature.

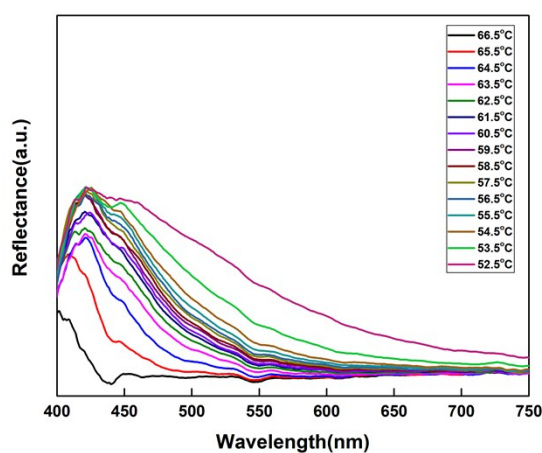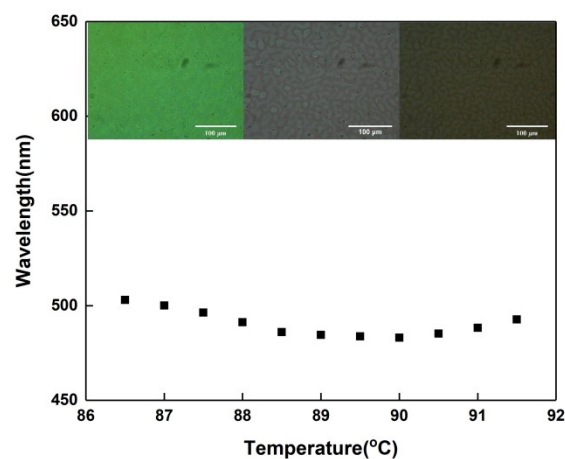

**Figure S17** (a) Temperature dependence of typical reflectance profile (b) The temperature dependence of the Bragg reflection wavelength for the blending mixture consisting of **H-EIII<sub>6</sub>** + 40% **S811** at a cooling rate with 0.2 °C min<sup>-1</sup>. The inset shows the POM image of BPs at different temperature.

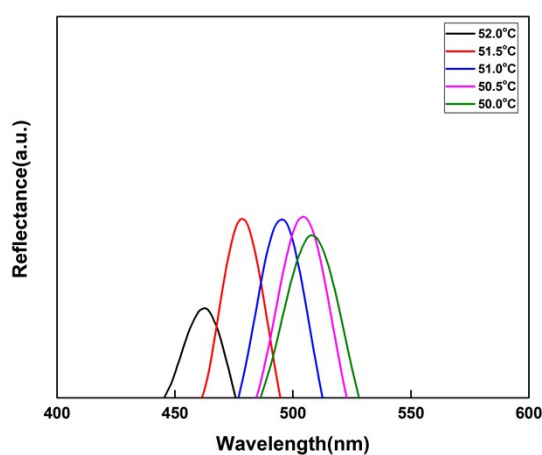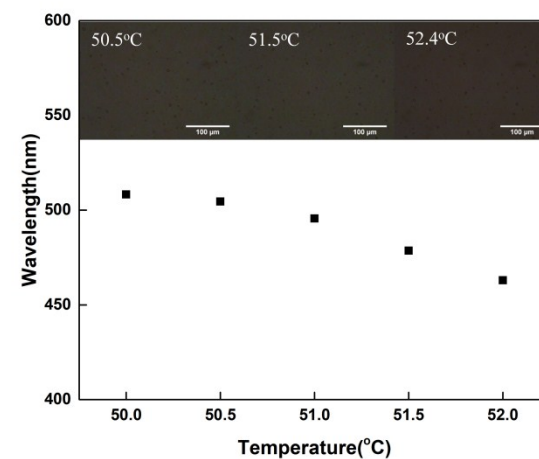

**Figure S18** (a) Temperature dependence of typical reflectance profile (b) The temperature dependence of the Bragg reflection wavelength for the blending mixture consisting of **H-EIII<sub>6</sub>-OH** + 30% **S811** at a cooling rate with 0.2 °C min<sup>-1</sup>. The inset shows the POM image of BPs at different temperature.

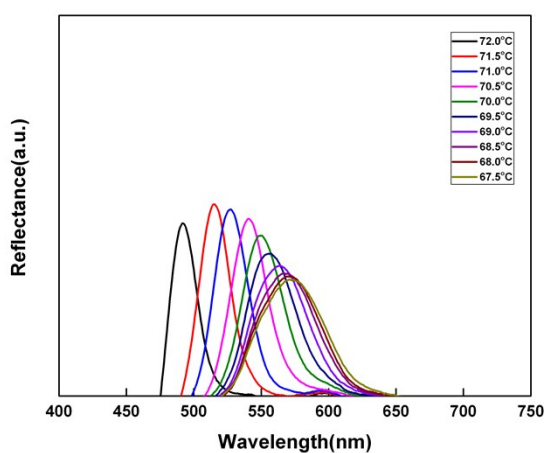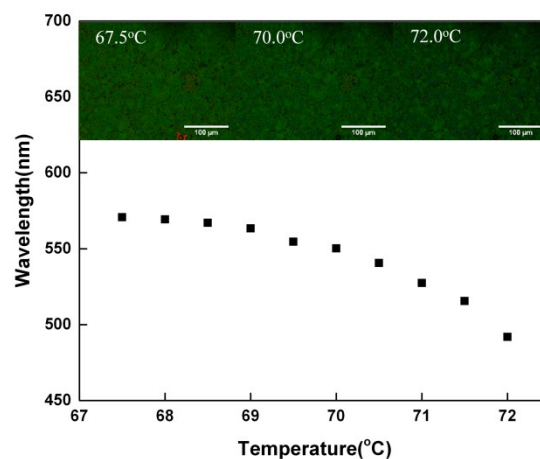

**Figure S19** (a) Temperature dependence of typical reflectance profile (b) The temperature dependence of the Bragg reflection wavelength for the blending mixture consisting of **OH-EIII<sub>6</sub>-OH** + 25% **S811** at a cooling rate with 0.2 °C min<sup>-1</sup>. The inset shows the POM image of BPs at different temperature.

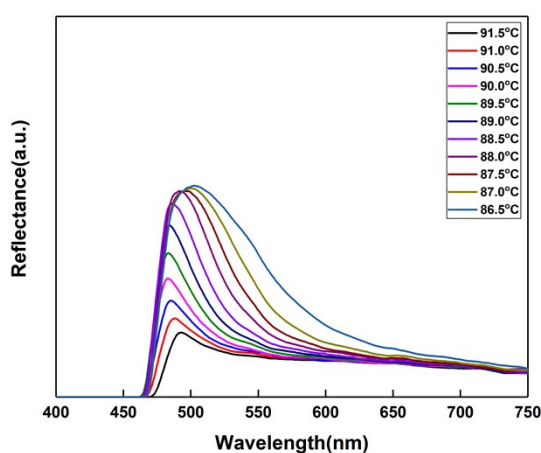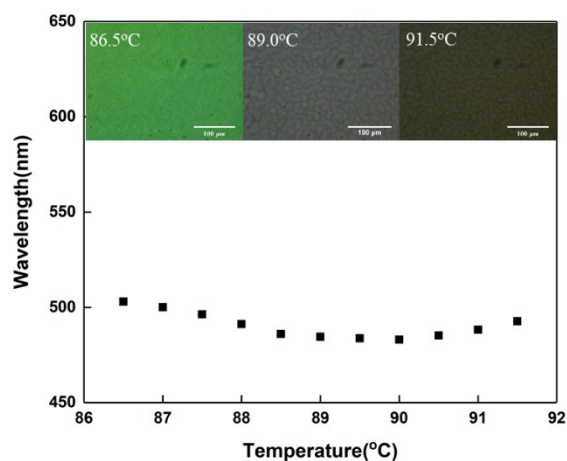

**Figure S20** (a) Temperature dependence of typical reflectance profile (b) The temperature dependence of the Bragg reflection wavelength for the blending mixture consisting of **OH-EIII<sub>6</sub>-F** + 30% **S811** at a cooling with 0.2 °C min<sup>-1</sup>. The inset shows the POM image of BPs at different temperature.

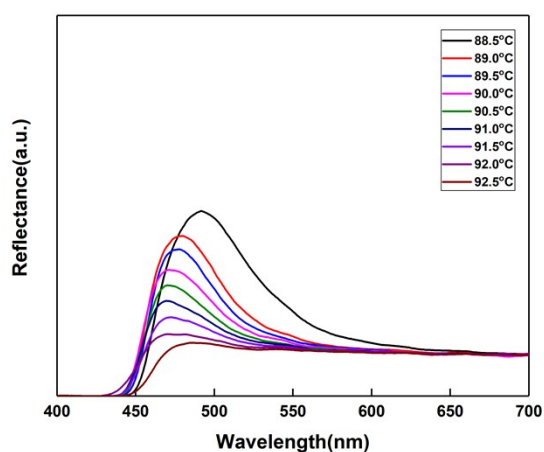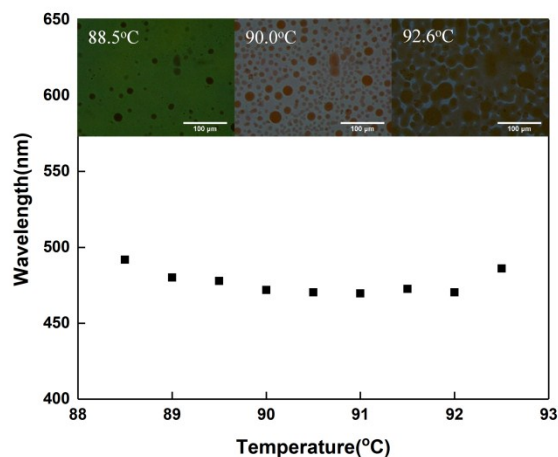

**Figure S21** (a) Temperature dependence of typical reflectance profile (b) The temperature dependence of the Bragg reflection wavelength for the blending mixture consisting of **OH-EIII<sub>6</sub>-F** + 30% **S811** at a heating rate with 0.2 °C min<sup>-1</sup>. The inset shows the POM image of BPs at different temperature.

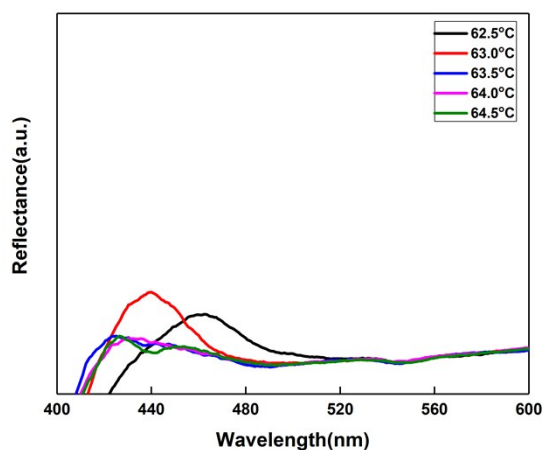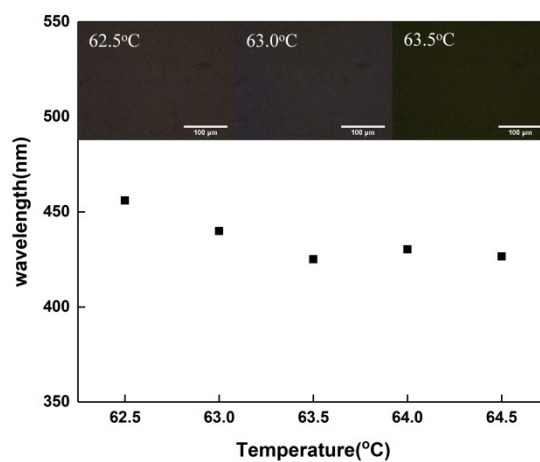

**Figure S22** (a) Temperature dependence of typical reflectance profile (b) The temperature dependence of the Bragg reflection wavelength for the blending mixture consisting of **H-EIII<sub>6</sub>-F** + 35% **S811** at a heating rate with 0.2 °C min<sup>-1</sup>. The inset shows the POM image of BPs at different temperature.

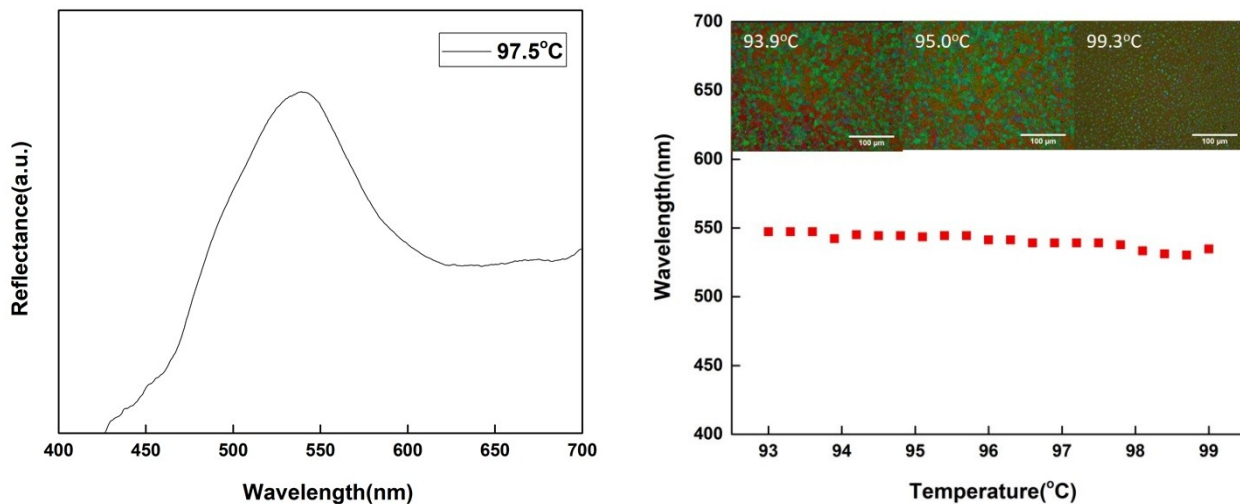

**Figure S23** (a) Temperature dependence of typical reflectance profile (b) The temperature dependence of the Bragg reflection wavelength for the blending mixture consisting of **OH-EIII<sub>6</sub>-OH + 5% ISO(6OBA)<sub>2</sub>** at a cooling rate with 0.2 °C min<sup>-1</sup>. The inset shows the POM image of BPs at different temperature.

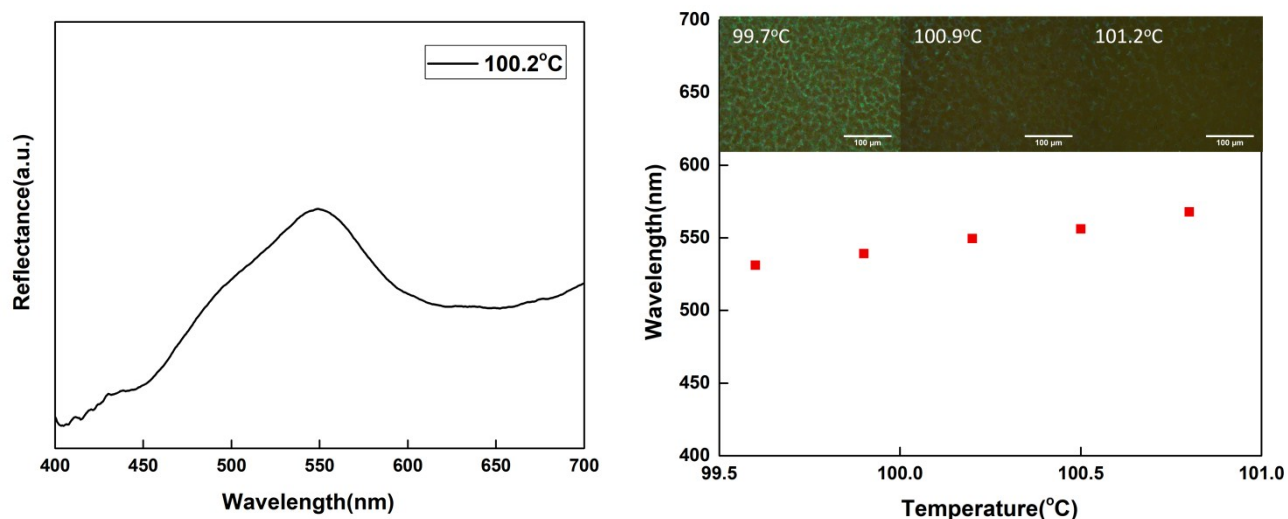

**Figure S24** (a) Temperature dependence of typical reflectance profile (b) The temperature dependence of the Bragg reflection wavelength for the blending mixture consisting of **OH-EIII<sub>6</sub>-OH + 5% ISO(6OBA)<sub>2</sub>** at a heating rate with 0.2 °C min<sup>-1</sup>. The inset shows the POM image of BPs at different temperature.

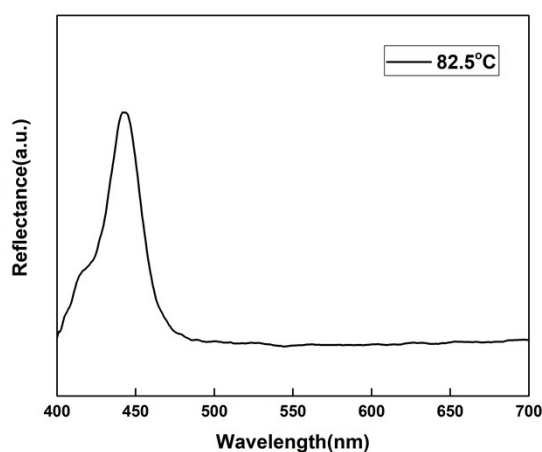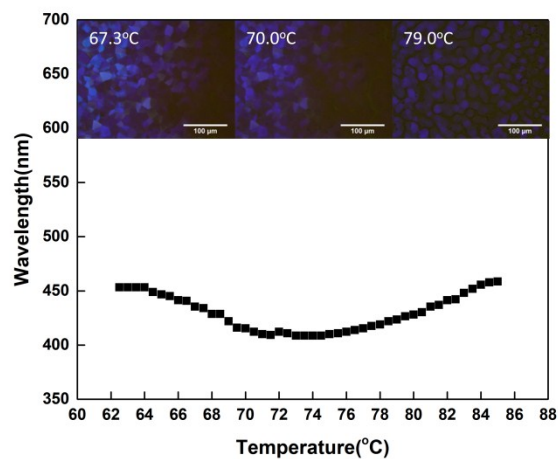

**Figure S25** (a) Temperature dependence of typical reflectance profile (b) The temperature dependence of the Bragg reflection wavelength for the blending mixture consisting of **H-III<sub>6</sub>-F + 15% ISO(6OBA)<sub>2</sub>** at a cooling rate with 0.2 °C min<sup>-1</sup>. The inset shows the POM image of BPs at different temperature.

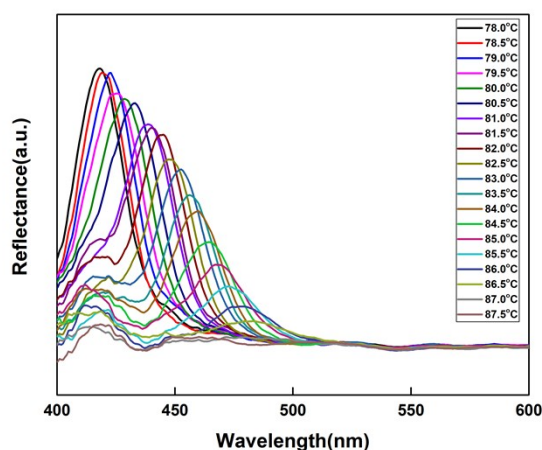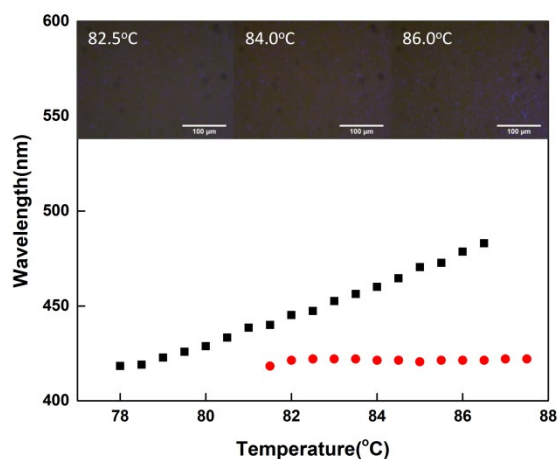

**Figure S26** (a) Temperature dependence of typical reflectance profile (b) The temperature dependence of the Bragg reflection wavelength for the blending mixture consisting of **H-III<sub>6</sub>-F + 15% ISO(6OBA)<sub>2</sub>** at a heating rate with 0.2 °C min<sup>-1</sup>. The inset shows the POM image of BPs at different temperature.

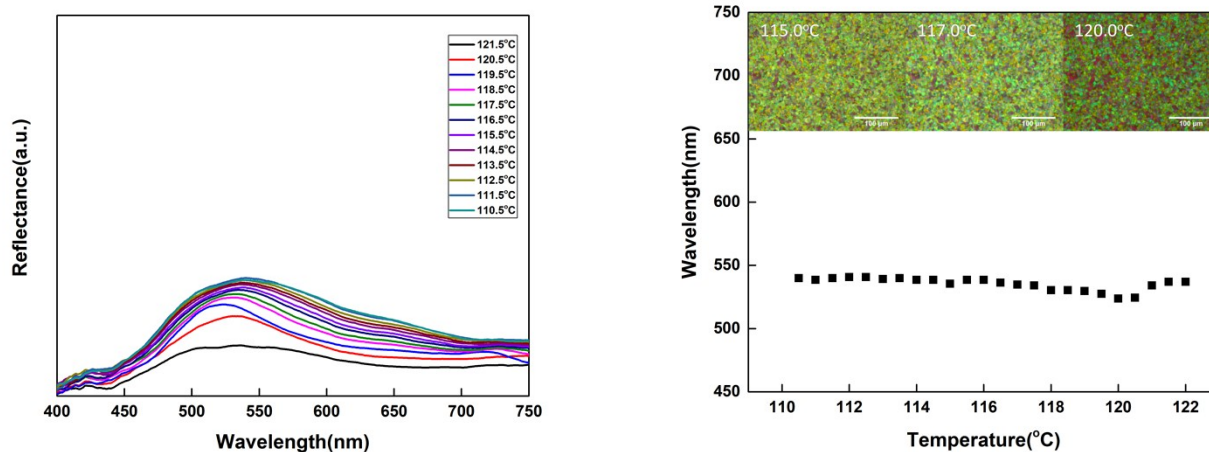

**Figure S27** (a) Temperature dependence of typical reflectance profile (b) The temperature dependence of the Bragg reflection wavelength for the blending mixture consisting of **OH-EIII<sub>6</sub>-F + 10% ISO(6OBA)<sub>2</sub>** at a cooling rate with 0.2 °C min<sup>-1</sup>. The inset shows the POM image of BPs at different temperature.

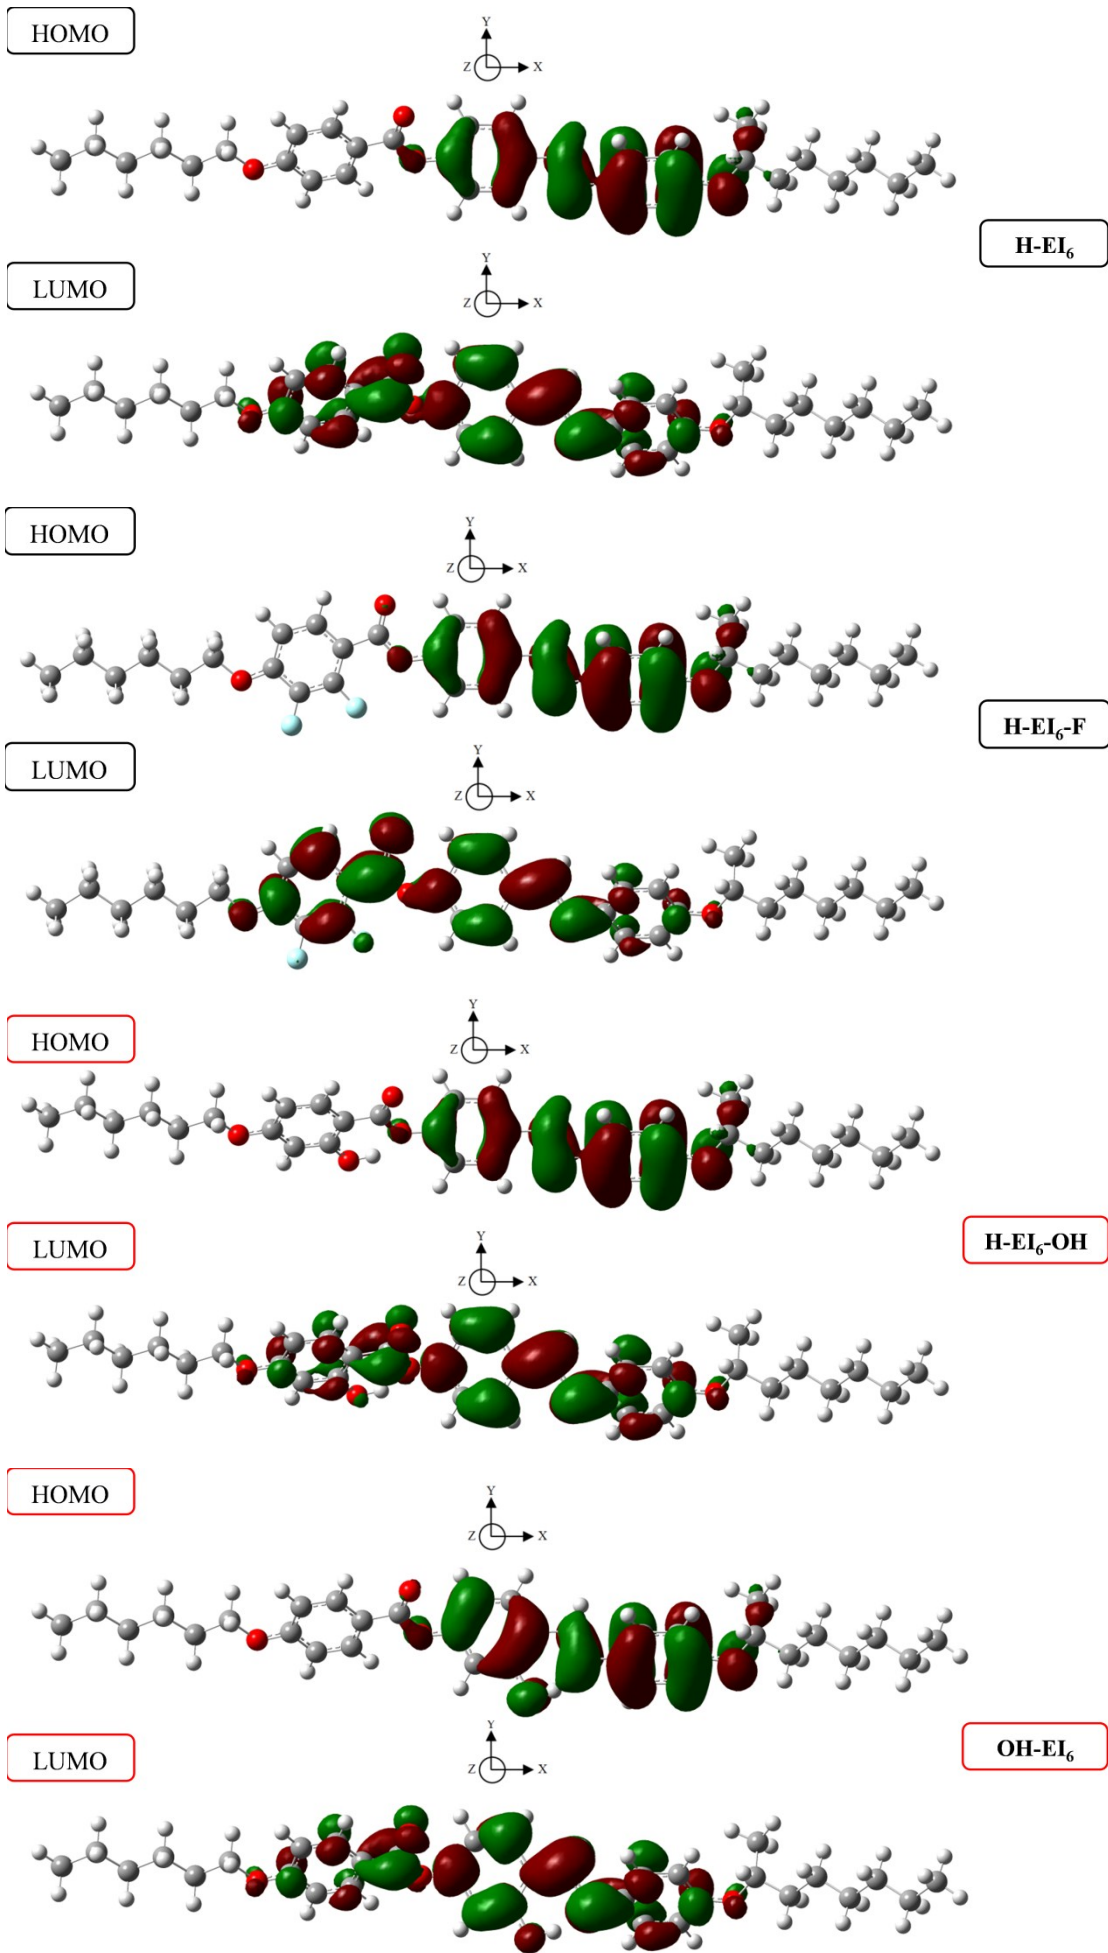



HOMO

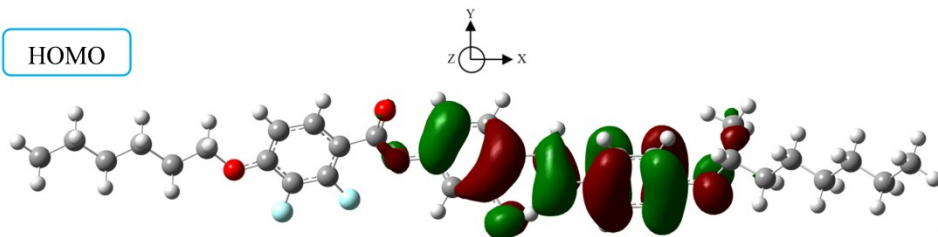

LUMO

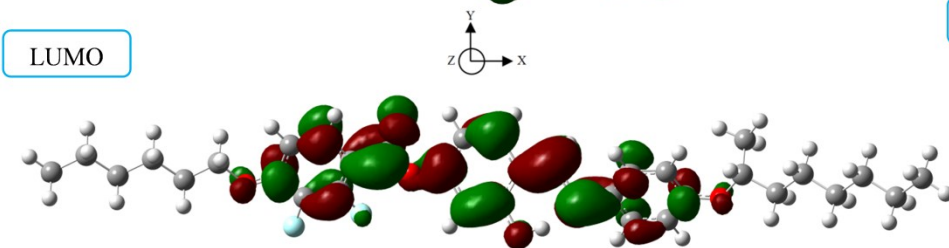

OH-EI<sub>6</sub>-F

HOMO

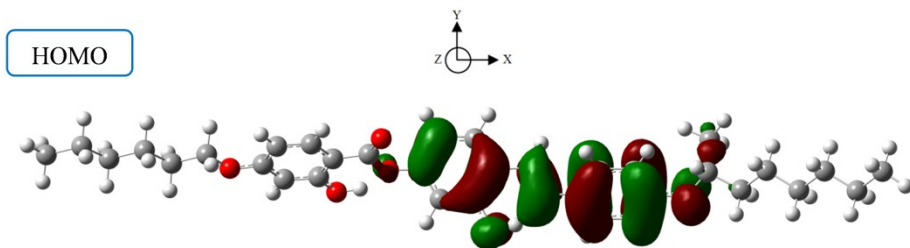

LUMO

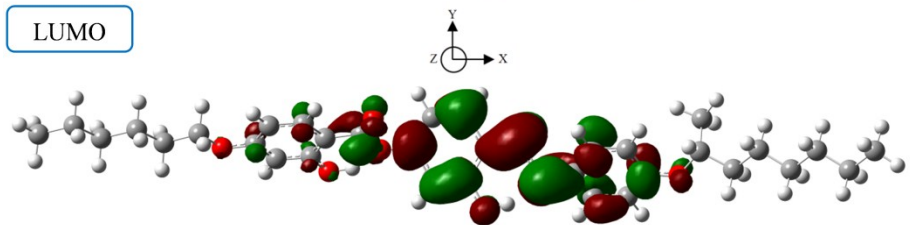

OH-EI<sub>6</sub>-OH

HOMO

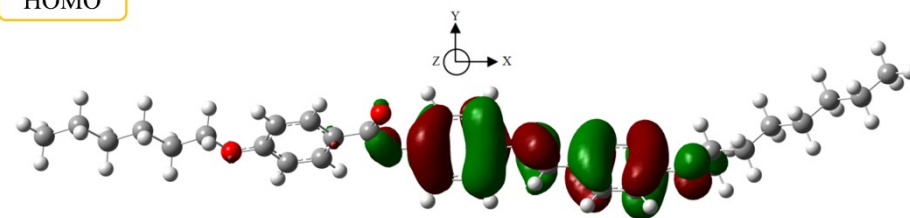

LUMO

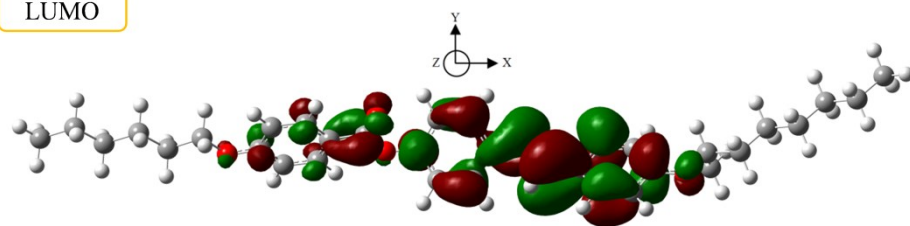

H-EI<sub>6</sub>

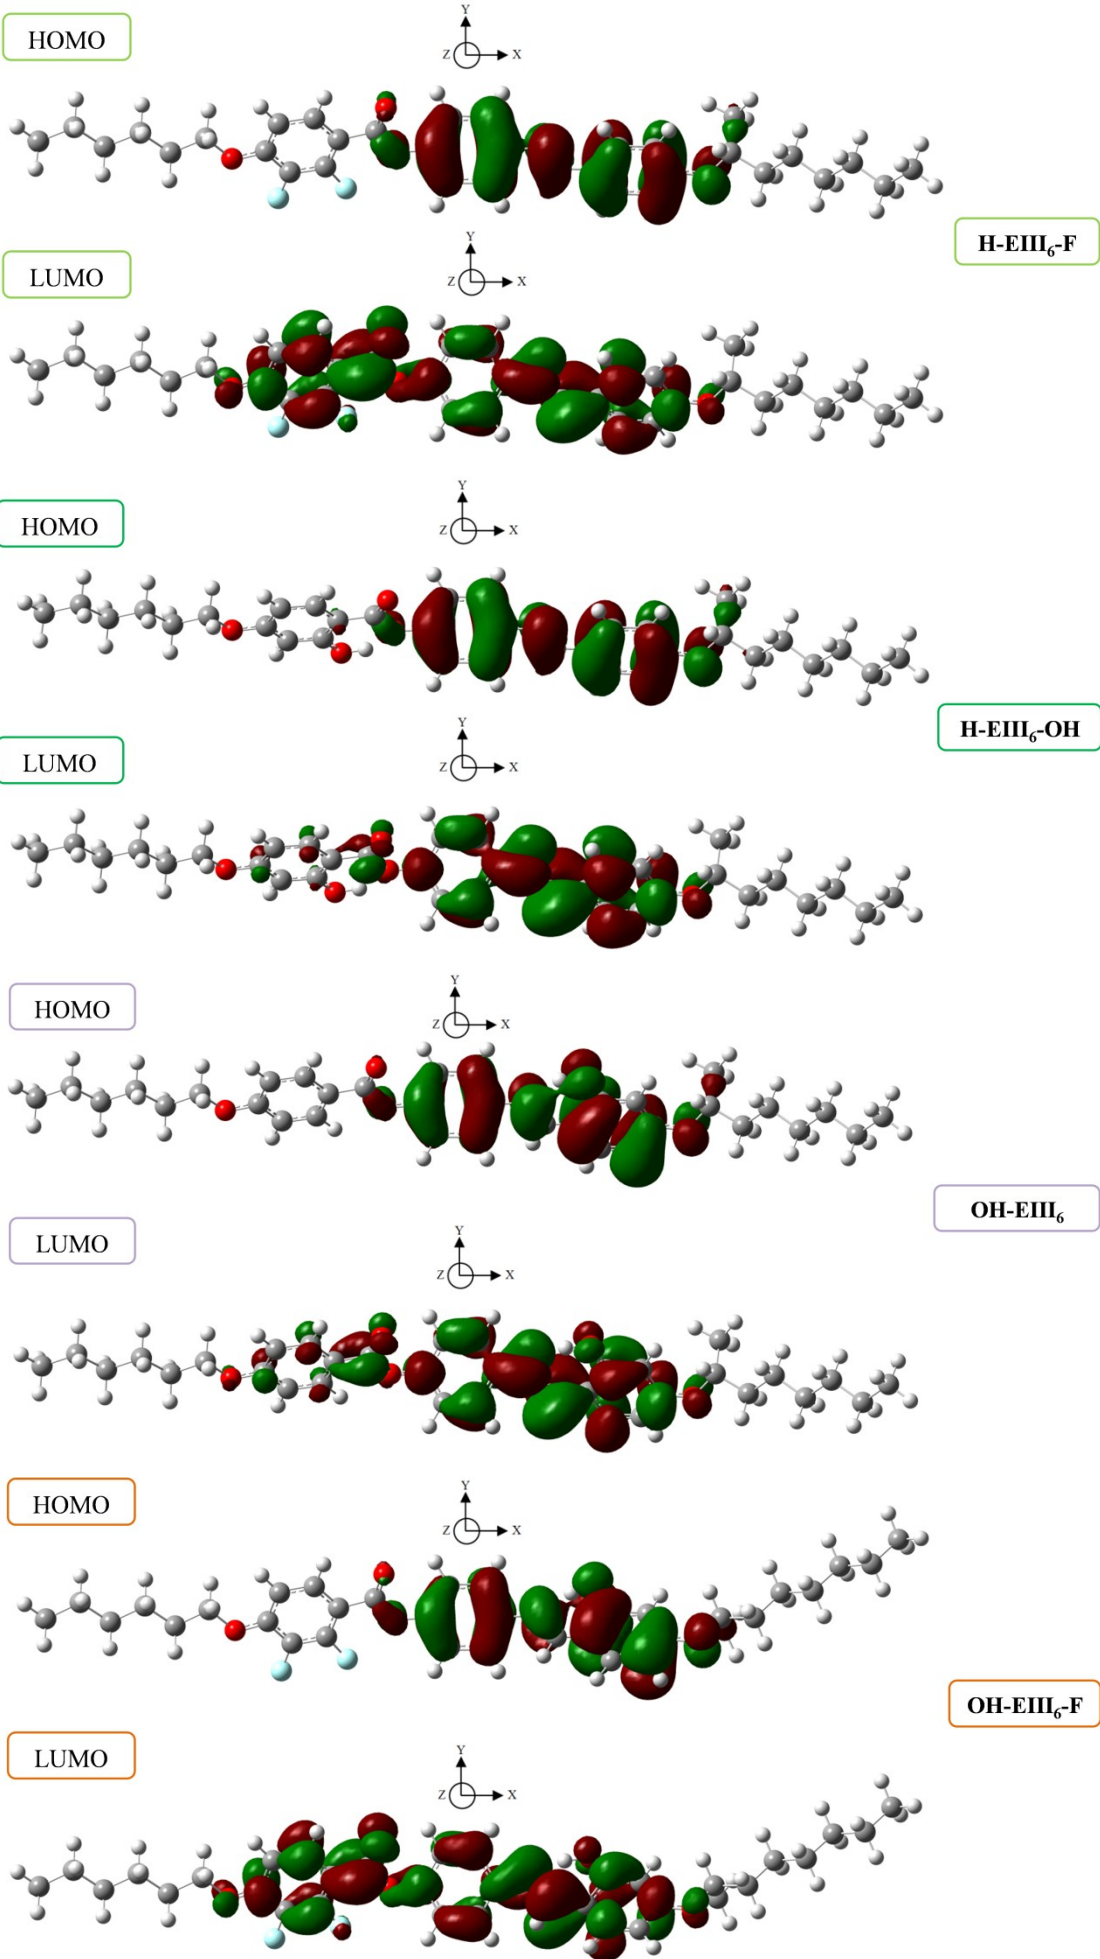

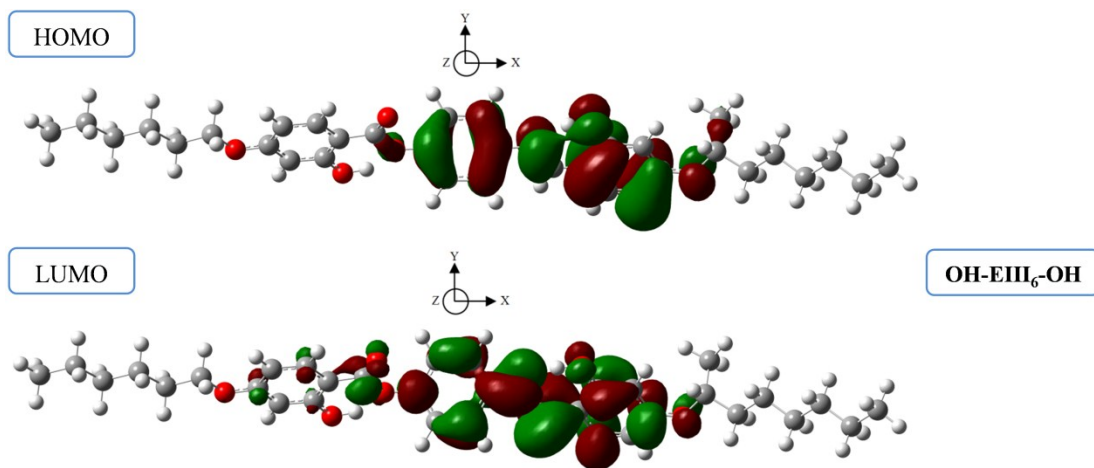

**Figure S28** The HOMO and LUMO of Schiff base mesogens. The simulation exchange functional and basis set are CAM-B3LYP and 6-311G(d, p), respectively. The isosurface is drawn at value of 0.02

**Table S1** DFT calculated HOMO, LUMO, energy gap, dipole moment components,  $\mu_x$ ,  $\mu_y$ ,  $\mu_z$  and modulus ( $\mu$ ) for Schiff base compounds.

| Compound                      | Energy (eV) |         |                 | Dipole moment (m in Debye) |         |         |                      |
|-------------------------------|-------------|---------|-----------------|----------------------------|---------|---------|----------------------|
|                               | HOMO        | LUMO    | $\Delta E$ (eV) | $\mu_x$                    | $\mu_y$ | $\mu_z$ | $\mu_{\text{total}}$ |
| <b>H-EI<sub>6</sub></b>       | -6.8868     | -0.4414 | 6.4455          | -2.4496                    | 1.5921  | 0.4135  | 2.9506               |
| <b>H-EI<sub>6</sub>-F</b>     | -6.8945     | -0.6230 | 6.2716          | -2.8581                    | 3.4159  | 1.0496  | 4.5759               |
| <b>H-EI<sub>6</sub>-OH</b>    | -6.9982     | -0.5544 | 6.4438          | -0.4046                    | 2.4468  | 1.2990  | 2.7996               |
| <b>OH-EI<sub>6</sub></b>      | -6.9897     | -0.5385 | 6.4512          | -0.6128                    | 2.5888  | 0.2704  | 2.6740               |
| <b>OH-EI<sub>6</sub>-F</b>    | -7.0131     | -0.6492 | 6.3639          | -0.8568                    | 4.3000  | 1.6678  | 4.6911               |
| <b>OH-EI<sub>6</sub>-OH</b>   | -7.1194     | -0.6621 | 6.4573          | 1.5361                     | 3.2433  | 1.3477  | 3.8334               |
| <b>H-EIII<sub>6</sub></b>     | -7.0681     | -0.2717 | 6.7964          | -0.2101                    | -0.4969 | -0.3511 | 0.6437               |
| <b>H-EIII<sub>6</sub>-F</b>   | -7.0878     | -0.3714 | 6.7163          | -0.4044                    | 1.1104  | 1.0407  | 1.5747               |
| <b>H-EIII<sub>6</sub>-OH</b>  | -7.2312     | -0.3808 | 6.8504          | 1.8446                     | 0.0364  | 0.4509  | 1.8993               |
| <b>OH-EIII<sub>6</sub></b>    | -7.0199     | -0.4122 | 6.6077          | -1.9845                    | -1.1800 | -0.9176 | 2.4845               |
| <b>OH-EIII<sub>6</sub>-F</b>  | -7.0335     | -0.5120 | 6.5215          | -2.2041                    | 0.5523  | 1.5859  | 2.7710               |
| <b>OH-EIII<sub>6</sub>-OH</b> | -7.1542     | -0.5178 | 6.6364          | 0.0836                     | -0.4762 | -0.0917 | 0.4921               |

**Table S2** DFT calculated principal polarizability components relative to the molecular polarizability tensor  $\alpha$ .

| Compound                      | $\alpha_{XX}$ | $\alpha_{YY}$ | $\alpha_{ZZ}$ | $\alpha^{\text{iso } a}$ | $\Delta\alpha^b$ | $\eta_\alpha^c$ |
|-------------------------------|---------------|---------------|---------------|--------------------------|------------------|-----------------|
| <b>H-EI<sub>6</sub></b>       | 739.467       | 326.712       | 271.340       | 445.84                   | 440.441          | 0.1886          |
| <b>H-EI<sub>6</sub>-F</b>     | 746.865       | 346.633       | 250.753       | 448.08                   | 448.172          | 0.3209          |
| <b>H-EI<sub>6</sub>-OH</b>    | 747.370       | 321.134       | 283.699       | 450.73                   | 444.954          | 0.1262          |
| <b>OH-EI<sub>6</sub></b>      | 772.080       | 341.410       | 283.157       | 465.55                   | 459.797          | 0.1900          |
| <b>OH-EI<sub>6</sub>-F</b>    | 755.558       | 340.866       | 265.018       | 453.81                   | 452.616          | 0.2514          |
| <b>OH-EI<sub>6</sub>-OH</b>   | 760.645       | 323.600       | 289.204       | 457.82                   | 454.243          | 0.1136          |
| <b>H-EIII<sub>6</sub></b>     | 734.196       | 313.275       | 284.577       | 444.02                   | 435.270          | 0.0989          |
| <b>H-EIII<sub>6</sub>-F</b>   | 736.729       | 323.101       | 275.726       | 445.19                   | 437.316          | 0.1625          |
| <b>H-EIII<sub>6</sub>-OH</b>  | 741.431       | 308.936       | 298.096       | 449.49                   | 437.915          | 0.0371          |
| <b>OH-EIII<sub>6</sub></b>    | 754.362       | 319.831       | 284.977       | 453.06                   | 451.958          | 0.1157          |
| <b>OH-EIII<sub>6</sub>-F</b>  | 759.949       | 333.978       | 269.383       | 454.44                   | 458.269          | 0.2114          |
| <b>OH-EIII<sub>6</sub>-OH</b> | 763.198       | 316.319       | 295.868       | 458.46                   | 457.105          | 0.0671          |

*a*: isotropic component,  $\alpha^{\text{iso}} = (\alpha_{XX} + \alpha_{YY} + \alpha_{ZZ})/3$

*b*: polarizability anisotropy,  $\Delta\alpha = [\alpha_{XX} - (\alpha_{YY} + \alpha_{ZZ})/2]$

*c*: asymmetry parameter,  $\eta_\alpha = [(\alpha_{YY} - \alpha_{ZZ}) / (\alpha_{XX} - \alpha^{\text{iso}})]$
